# A Systematic review and Network Meta-analysis of pharmaceutical interventions used to manage chronic pain

<sup>1,2</sup>Ash Shetty\*, <sup>3</sup>Gayathri Delanerolle\*, <sup>7</sup>Heitor Cavalini\*\*, <sup>Chunli Deng\*\*</sup>, <sup>9,10</sup>Xiaojie Yang, <sup>11</sup>Amy Boyd, <sup>2</sup>Tacson Fernandez, <sup>6,7</sup>Peter Phiri, Arun Bhaskar<sup>8</sup>, <sup>4,5,7</sup>Jian Qing Shi,

## Affiliations

<sup>1</sup>University College London Hospitals NHS Foundation Trust

<sup>2</sup>University College London, UK

<sup>3</sup>Nuffield Department of Primary Care Health Sciences, University of Oxford, OX3 7JX, Oxford, UK

<sup>4</sup>Southern University of Science and Technology, Shenzhen, 518055, China

<sup>5</sup>Psychology Department, Faculty of Environmental and Life Sciences, University of Southampton, SO17 1BJ, Southampton, UK

<sup>6</sup>Southern Health NHS Foundation Trust, SO40 2RZ, UK

<sup>8</sup>Imperial College Healthcare NHS Trust, London, UK

<sup>9</sup>School of Statistics and Mathematics, Yunnan University of Finance and Economics, China

<sup>10</sup>National Centre for Applied Mathematics Shenzhen, China

<sup>11</sup>University of Oxford, UK

## Corresponding author: Professor Ashish Shetty

Consultant Pain Medicine/Professor in Pain Medicine

University College London

235, Euston Road, London NW1 2BU

[ashetty@nhs.net](mailto:ashetty@nhs.net)

\* Shared first author

\*\* Shared second author

## Declarations

## Funding

Not applicable

## Conflicts of interest

AS has received funding from Neurokor, Boston Scientific and Medtronic. PP has received research grants from Novo Nordisk, Queen Mary University of London, John Wiley & Sons, Otsuka, outside the submitted work. All other authors report no conflict of interest. The views expressed are those of the authors and not necessarily those of the NHS, the National Institute for Health Research, the Department of Health and Social Care or the Academic institutions.

## Availability of data and material

The authors will consider sharing the dataset gathered upon receipt of reasonable requests.

## Code availability

The authors will consider sharing the novel code created upon receipt of reasonable requests.

## Author contributions

AS and GD developed the study protocol and embedded this within the POP project. GD and JQS designed and completed the study analysis. The data extraction was completed by HC and CD. All authors critically appraised and commented on previous versions of the manuscript. All authors read and approved the final manuscript.

**Ethics approval:** Not applicable

**Consent to participate:** Not applicable

**Consent for publication:** All authors consented to publish this manuscript.

60 **Abstract**

61

62 Background: It is estimated 1.5 billion of the global population suffer from chronic pain with  
63 prevalence increasing with demographics including age. It is suggested long-term exposure  
64 to chronic could cause further health challenges reducing people's quality of life. Therefore,  
65 it is imperative to use effective treatment options.

66

67 Purpose: We explored the current pharmaceutical treatments available for chronic pain  
68 management to better understand drug efficacy and pain reduction.

69

70 Methods: A systematic methodology was developed and published in PROSPERO  
71 (CRD42021235384). Keywords of opioids, *acute pain*, *pain management*, *chronic pain*,  
72 *opioids*, *NSAIDs*, and *analgesics* were used across PubMed, Science direct, ProQuest, Web  
73 of science, Ovid Psych INFO, PROSPERO, EBSCOhost, MEDLINE, ClinicalTrials.gov and  
74 EMBASE. All randomised controlled clinical trials (RCTs), epidemiology and mixed-methods  
75 studies published in English between the 1<sup>st</sup> of January 1990 and 30<sup>th</sup> of April 2022 were  
76 included.

77

78 Data synthesis: A total of 119 studies were included. The data was synthesised using a tri-  
79 partied statistical methodology of a meta-analysis (24), pairwise meta-analysis (24) and  
80 network meta-analysis (34).

81

82 Limitations: Small sample sizes, lack of uniformity with pain assessments and sub-optimal  
83 clinical trial designs were observed within the pooled data.

84

85 Conclusion: Chronic pain is a public health problem that requires far more effective  
86 pharmaceutical interventions with minimal better side-effect profiles which will aid to develop  
87 better clinical guidelines. The importance of understanding ubiquity of pain by clinicians,  
88 policy makers, researchers and academic scholars is vital to prevent social determinant  
89 which aggravates issues.

90

91

92

93

94

95

96

97

98

99

100

101

102

103

104

105

106

107

108

109

110

111

112

113

114

115  
116  
117  
118  
119  
120  
121  
122  
123  
124  
125  
126  
127  
128  
129  
130  
131  
132  
133  
134  
135  
136  
137  
138  
139  
140  
141  
142  
143  
144  
145  
146  
147  
148  
149  
150  
151  
152  
153  
154  
155  
156  
157  
158  
159  
160  
161  
162

## Introduction

Chronic non-cancer pain conditions are prevalent, highly debilitating and have high cost implications to health and social care. These conditions affect patients, their families and society at large, impacting approximately 20% of the global population<sup>[1]</sup>. The prevalence of pain conditions among females of all ages appears to be increasing<sup>[2]</sup>. Complexities around diagnosis and treatment of chronic pain conditions have meant that there is a paucity of standardised clinical guidelines that could potentially improve the clinical practice landscape, globally.

Convalescent periods for many chronically ill patients can be protracted and daunting. This may be especially true where pain medication has been used in the long term<sup>[3]</sup>. Long-term exposures to chronic pain coincide with mental health and wellbeing issues, exacerbating patient-reported outcomes such as sleep disturbances, depression, dependence and morbidities such as myalgia, lethargy and fatigue<sup>[4]</sup>. Better understanding of long-term implications requires consideration of “life-course approaches” and at present, this could evolve further within pain medicine epidemiology<sup>[5]</sup>.

The increase in chronic pain conditions contributes to higher healthcare costs towards clinical management of patients, and also reduced levels of productivity for employers<sup>[6]</sup>. This may be partly due to increases in opioid use within this population of patients, often reducing their capacity to conduct normal working hours. Current clinical guidelines recommend non-invasive pain management options as a first-line treatment among non-cancer patients in particular, although overdose, dependency and mortality due to opioid use has consistently increased over time<sup>[7]</sup>. It was reported that global opioid use has doubled between 2011 and 2003 to 2011 and 2013 to 7.35 billion daily doses per year<sup>[6]</sup>. These figures were attributed to North America and Europe largely and could reflect the increase in the population<sup>[7]</sup>. Attrition data with regards to differentiating those with recreational use and those on medical prescription for a long-term conditions during this period remains scarce.

The World Health Organisation’s (WHO) analgesic framework could be a useful model to consider while determining the rates and prevalence of pain management methods including opioid use among those with and without cancer pain<sup>[8]</sup>. It is particularly important to develop evidence-based guidelines specific to each condition, with flexible pain medication use as a single regimen or a combination of treatments that could improve the overall quality of life of these patients<sup>[9]</sup>. The premise to increase the strength and frequency of pain medications is in general based on disease burden i.e. progression of symptoms and patients reported symptoms. Pain inferences in particular could play a vital role in the use of analgesics<sup>[10]</sup>. The primitive consciousness and the link to mental health is yet another factor that would exacerbate pain medication use. Additional approaches, for example using a cognitive behavioural-based therapeutic protocol with pharmaceutical management can benefit patients<sup>[10]</sup>. However, the benefits of these approaches remain unclear due to a paucity of evidence from both clinical trials and real-world study evidence. We have designed the POP project as the initial step to conduct exploratory work on pharmaceutical management of chronic pain. With the rising need for comparative effectiveness research, increasingly more systematic reviews focus on evaluating the relative efficacy and acceptability of drugs and therapeutic interventions<sup>[11]</sup>. However, some of the interventions for long-term conditions are

163 not available for clinical practice and there are several options with varying efficacy even  
164 within a specific class of interventions<sup>[12]</sup>.

165

## 166 **Methods**

167

168 We developed a wide systematic methodology and published this as a protocol with multiple  
169 research questions in the first instance in PROSPERO (CRD42021235384). Data from  
170 studies meeting the inclusion criteria were extracted and Pairwise Meta-Analysis with  
171 random and fixed effects models was carried out. Pooled mean difference (MD) together  
172 with 95% confidence intervals (CIs) are reported overall and for sub-groups. By combining  
173 the direct and indirect comparisons between different interventions, Network Meta-Analysis  
174 was conducted to explore the relative treatment effects among all the drugs included in our  
175 analysis.

176

### 177 *Aims*

178

179 The aims of the study was to explore the prevalence of treatments of effects in chronic pain  
180 based on pharmaceutical treatments.

181

### 182 *Search strategy*

183

184 The search strategy used key words of *chronic pain, opioids, acute pain, pain management,*  
185 *opioids, NSAIDs, analgesics* across multiple databases (PubMed, Science direct, ProQuest,  
186 Web of science, Ovid Psych INFO, PROSPERO, EBSCOhost, MEDLINE, ClinicalTrials.gov  
187 and EMBASE).

188

### 189 *Eligibility criteria*

190

191 All randomised controlled clinical trials (RCTs), epidemiology and mixed-methods studies  
192 reporting the use of pain medication for non-cancer chronic pain conditions published in  
193 English between the 1<sup>st</sup> January 1990 and 30<sup>st</sup> April 2022 were included. Opinions,  
194 commentaries and editorials were excluded.

195

### 196 **{PRISMA diagram}**

197

### 198 *Data extraction*

199

200 Participants included in the study populations were those who were experiencing chronic  
201 pain. All studies reporting drug efficacy associated with chronic pain were extracted by way  
202 of the interventions, measures of tool and numeric results. An extraction template specific to  
203 the objectives of the study was developed to gather a wider dataset with vital data for  
204 statistical analysis. The number of studies was the number of independent RCTs included in  
205 analysis, however sub-studies were extracted from the same clinical trials with different  
206 duration periods. The results of different stages in one designed study can be regarded as  
207 new sub-studies as new rows in data analysis.

208 Data was extracted by two investigators and any disputes for eligibility was discussed and  
209 agreed with the Chief Investigator of the study. All studies included within the analyses were  
210 independently reviewed.

211

212

213  
214  
215  
216  
217  
218  
219  
220  
221  
222  
223  
224  
225  
226  
227  
228  
229  
230

### *Outcome measures*

Outcomes were reported as mean, median, standard deviation and confidence intervals. Mean and standard deviation were extracted as the main outcomes including pre-treatment pain scores at baseline, post-treatment pain scores and pain score changes of each group. Multiple pain assessments for confirming a clinical diagnosis, severity and progression of chronic pain were identified. These include VAS (visual analogue scale, 0-10 or 0-100), NRS (11-point numeric rating scale, 0-10), BPI (Brief Pain Inventory interference scale, 0-10), MPQS (McGill Pain Questionnaire-Short Form (Sensory and Affective subscales, VAS intensity measure, 0-10), VRS (verbal rating scale, 0-10), NIH-CPSI (National Institutes of Health Chronic Prostatitis Symptom Index, pain scores, 0-21), PI (pain intensity on a 20-point scale, 0-20).

As most widely used tools for assessing pain such as VAS, NRS, VRS, use a 11-point numeric rating scale from 0 to 10, the following standardisation formula was used to unify all pain scores into the same scale:

$$\text{Scaled Pain Score} = \text{Original Pain Score} * \frac{10}{\text{Scale Range}}$$

231  
232  
233  
234  
235  
236  
237  
238  
239  
240  
241  
242

As all outcomes of interest were continuous, the calculation based on pain scores was performed by using mean differences (MD) with a 95% confidence interval (CI) to report the effects between the group comparisons.

### *Exposures*

The exposures of interest were selected based on the key features of pharmacological management used to treat non-cancer chronic pain, including and not limited to a pain condition being the primary or the secondary condition. Neurological and psychological symptoms leading up to the use of pharmaceutical use within the included population were also considered.

243  
244  
245  
246  
247  
248  
249  
250

### *Statistical analysis plan*

A meta-analysis, pairwise meta-analysis (PMA) and Network meta-analysis (NMA) were used to compare all treatments used in managing chronic pain. The fundamental difference between them is that PMA produces only one estimate of pooling effects from the selected pair of interventions, while NMA produces multiple comparative estimates of pooling effects by connecting all alternative interventions.<sup>[14]</sup>

251  
252  
253  
254  
255  
256  
257  
258  
259

We incorporated direct and indirect treatment comparisons within the NMA providing greater statistical precision compared to a PMA<sup>[20]</sup>. Rankings of a set of drugs or combined interventions for assessing chronic pain with respect to their efficacy was calculated based on the netowkr models. Homogeneity and Consistency were tested to see if the assumptions in NMA were violated. NMA was conducted with 2-arm and multi-arm studies including more types of Pharmaceutical interventions. PMA was conducted with 2-arm studies with the placebo as the control group while a pharmaceutical intervention as the experimental group. The overall pharmaceutical efficacy of extracted studies was produced by pooling all

260 treatment effects. PMA was also used on studies with the same drug as the treatment group  
261 to see the specific drug efficacy.

262

263  $I^2$  and p-value were commonly used to detect statistical heterogeneity. A value of  $I^2$  larger  
264 than 50% with a much smaller p-value indicates strong heterogeneity. Correspondingly,  $I^2$   
265 less than 50% with a large p-value indicates fairly weak heterogeneity<sup>[16]</sup>. A random effects  
266 model was chosen when there was high heterogeneity, whereas a fixed effects model was  
267 used if weak or no heterogeneity was detected<sup>[17]</sup>. Due to the presence of high  
268 heterogeneity, subgroup analyses were carried out to identify the sources. To assess the  
269 robustness of the pooled results within the PMA, a sensitivity analysis was completed.  
270 Publication bias was evaluated with funnel plots and Egger tests. The statistical analyses  
271 were produced by R and packages were used to provide outputs in compliance with best  
272 practice and reporting guidelines<sup>[18]</sup>.

273

274

## 275 Results

276

277 Of the 119 systematically included studies (Table 1) with 17,708 participants, 24 were used  
278 in the meta-analysis. The 24 studies were placebo-controlled RCTs with a primary endpoint  
279 of efficacy. Of the 119 studies, 34 were used in the NMA to build a connected network.

280

281 Opioids (Table 2) were most commonly tested in 32 (26.89%) studies enrolling 5518  
282 (31.16%) participants, where *Morphine*, *Oxycodone* and *Fentanyl* were prominently tested.  
283 *Lidocaine*, *Naloxone* and *Gabapentin* were the most frequently tested non-opioid drugs for  
284 chronic pain. The most common pain among chronic pain patients were lower back pain,  
285 which was explored in 26 (21.85%) studies with a pooled sample of 4626 (26.12%) while 13  
286 studies reported chronic back pain among 1068 (6.03%) participants. The following pain  
287 types are post-surgical pain and neuropathic pain with 19 (15.97%) and 10 (8.4%) studies  
288 involved to test the efficiency of NSAID drugs on patients.

289

290 Meta-analysis of mean difference of pain scores were applied to 24 studies with a sample of  
291 2546 participants, producing a pooled mean difference (MD) of -0.89 (95% CI = [-1.31, -  
292 0.47]). There was a significant difference between chronic pain scores of patients taking  
293 NSAIDs compared to a placebo. Averagely, 0.89 point (0-10 scale) of pain reduction was  
294 observed based on the random effects model. A significant statistical drug efficiency was  
295 observed with BTX-A and Ketamine. A negative pooled mean difference was determined  
296 between BTX-A and Ketamin versus a placebo with a pain reduction of 0.98 -1.26 based on  
297 a -10 scale, respectively. Similar statistical results were not observed with other drugs in  
298 comparison to a placebo.

299

300 With the common comparator as “*placebo*”, the connected network included 34 studies, 52  
301 pairwise comparisons, 32 interventions and 29 study designs. Gabapentin had a significant  
302 mean difference equaling to -1.49 (95% CI = [-2.76, -0.23], p-value < 0.05). Most  
303 interventions had a negative mean difference compared to a *placebo*, but a 95% CI covering  
304 0 indicated insignificant effects for reducing pain. The results within the network were more  
305 conservative with the combination of direct and indirect evidence indicating most  
306 pharmaceutical interventions selected might have benefited from the “*placebo effect*”.

307

308  
309

Table 1 Characteristics of the studies included in systematic review

| Study ID | Authors             | Publication Year | Study Type                      | Pain Type                                   | Intervention                  | Sample Size | Mean Age | Country     | Included for MA | Included for NMA |
|----------|---------------------|------------------|---------------------------------|---------------------------------------------|-------------------------------|-------------|----------|-------------|-----------------|------------------|
| 1        | Weizman et al.      | 2018             | P-C,RCT                         | Chronic-pain                                | THC                           | 17          | 33.3     | Israel      | No              | No               |
| 2        | Krebs et al.        | 2018             | RCT                             | Back,Arthritis,Chronic-pain                 | Opioid                        | 240         | 56.8     | USA         | No              | No               |
| 3        | AbdelHafeez et al.  | 2019             | Double-blind,P-C,RCT            | Chronic-pain                                | Gabapentin                    | 60          | 32.7     | UK          | Yes             | Yes              |
| 4        | Bushey et al.       | 2021             | RCT                             | Chronic-pain                                | Opioid                        | 241         | 37       | USA         | No              | No               |
| 5        | Bruehl et al.       | 2021             | Double-blind,P-C,RCT,Cross over | Low-back,Chronic-pain                       | Morphine + Naloxone           | 191         | 36.5     | USA         | No              | No               |
| 6        | Worley et al.       | 2015             | RCT                             | Chronic-pain                                | Buprenorphine/Naloxone        | 149         |          | USA         | No              | No               |
| 7        | Dindo et al.        | 2018             | Single-blinded,RCT              | Postsurgical,Chronic-pain                   | ACT                           | 76          | 62.2     | USA         | No              | No               |
| 8        | Hruschak et al.     | 2019             | Single-blinded,RCT              | Chronic-pain                                | IPGT                          | 30          | 53.9     | USA         | No              | No               |
| 9        | Azevedo et al.      | 2013             |                                 | Chronic-pain                                | Opioid                        | 2213        | 45       | Portugal    | No              | No               |
| 10       | Gudin et al.        | 2020             | Open-label,P-C,Uncontrolled     | Low-back,Noncancer,Chronic-pain             | NKTR-181                      | 402         | 52       | USA         | No              | No               |
| 11       | Stahl et al.        | 2019             | RCT                             | Low-back,Chronic-pain                       | Venlafaxine                   | 209         | 69.6     | USA         | No              | No               |
| 12       | Schliessbach et al. | 2018             | Double-blind,P-C,RCT            | Low-back,Chronic-pain                       | Imipramine                    | 50          | 54.4     | Switzerland | No              | No               |
| 13       | Mohamed et al.      | 2016             | Double-blind,RCT                | PostsurgicalNeuropathic,Cancer,Chronic-pain | Morphine                      | 90          | 50.43    | Egypt       | No              | No               |
| 14       | Schliessbach et al. | 2018             | P-C,RCT                         | Low-back,Chronic-pain                       | Oxycodone+Imipramine+Clobazam | 98          | 55       | Switzerland | No              | Yes              |
| 15       | Hermans et al.      |                  | Double-blind,P-C,RCT,Cross over | Arthritis,Chronic-pain                      | Naloxone                      | 31          | 39.8     | Belgium     | No              | No               |
| 16       | Todorov et al.      | 2005             |                                 | Chronic-pain                                | Gabapentin+Tiagabine          | 91          | 42       | USA         | No              | Yes              |
| 17       | Sadatsune et al.    |                  | Double-blind,P-C,RCT            | Chronic-pain                                | Gabapentin                    | 40          | 51.5     | Brazil      | No              | No               |
| 18       | Edwards et al.      | 2016             | RCT                             | Back,Chronic-pain                           | Opioid                        | 31          | 49       | USA         | No              | No               |
| 19       | Katz et al.         | 2011             | Double-blind,P-C,RCT            | Low-back,Chronic-pain                       | Naproxen +Tanezumab           | 129         | 52.1     | USA         | No              | No               |
| 20       | Hayek et al.        | 2021             | Double-blind,RCT,Crossover      | Chronic-pain                                | Opioid+Bupivacaine            | 16          | 63.1     | USA         | No              | No               |
| 21       | Schliessbach et al. | 2017             | Double-blind,P-C,Crossover      | Back,Chronic-pain                           | Clobazam                      | 49          | 54.3     | Switzerland | No              | Yes              |
| 22       | Bruehl et al.       | 2004             | Double-blind,P-C,RCT,Cross over | Low-back,Noncancer,Chronic-pain             | Opioid                        | 28          | 37.3     | USA         | No              | No               |
| 23       | Kim et al.          | 2018             | Double-blind,RCT                | Postsurgical,Chronic-pain                   | Nefopam                       | 58          | 40       | South korea | No              | No               |

|    |                       |      |                                    |                                   |                        |     |       |             |     |     |
|----|-----------------------|------|------------------------------------|-----------------------------------|------------------------|-----|-------|-------------|-----|-----|
| 24 | Eisenach et al.       | 2010 | Double-blind, P-C, RCT, Cross over | Chronic-pain                      | Ketorolac              | 15  | 44    |             | No  | No  |
| 25 | Rauk et al.           | 2014 | Single-blinded, RCT, Crossover     | Chronic-pain                      | Adenosine /Clonidine   | 22  | 44    | USA         | No  | No  |
| 26 | Buchheit et al.       | 2019 | Double-blind, P-C, RCT             | Postsurgical, Chronic-pain        | Valproate              | 128 | 57    | USA         | No  | No  |
| 27 | Papadokostakis et al. | 2005 |                                    | Back, Chronic-pain                | Calcitonin             | 110 | 65    | Greece      | No  | No  |
| 28 | Gould et al.          | 2020 | Double-blind, 4-arm, RCT           | Back, Chronic-pain                | Desipramine            | 141 | 51.5  | USA         | No  | Yes |
| 29 | Schnitzer et al.      | 2016 | Double-blind, P-C, RCT             | Back, Chronic-pain                | D-cycloserine          | 41  | 53.2  | USA         | No  | No  |
| 30 | Neke et al.           | 2015 | Double-blind, P-C, RCT, Cross over | Low-back, Noncancer, Chronic-pain | Hydrocortisone         | 26  | 71    | Australia   | Yes | Yes |
| 31 | Sopata et al.         | 2015 | Double-blind, P-C, RCT             | Chronic-pain                      | Opioid                 | 100 | 62.1  | Poland      | No  | No  |
| 32 | Kendall et al.        |      | Double-blind, P-C, RCT             | Postsurgical, Chronic-pain        | Lidocaine              | 148 | 48    | usa         | No  | No  |
| 33 | Hongo et al.          | 2015 | RCT                                | Back, Chronic-pain                | Risedronate+Elcatonin  | 45  | 70.9  | Japan       | No  | No  |
| 34 | Amr & Yousef          | 2010 | Double-blind, RCT                  | Postsurgical, Chronic-pain        | Venlafaxine+Gabapentin | 150 | 45    | Egypt       | No  | No  |
| 35 | Pedersen et al.       | 2014 | Double-blind, RCT                  | Chronic-pain                      | Codeine+Paracetamol    | 58  | 49    | Norway      | No  | No  |
| 36 | Choi et al.           | 2016 | Double-blind, RCT                  | Postsurgical, Chronic-pain        | Lidocaine              | 90  | 34    | Korea       | No  | No  |
| 37 | Bruehl et al.         | 2014 | P-C, RCT                           | Back, Chronic-pain                | Morphine+Naloxone      | 50  | 36.9  | USA         | Yes | Yes |
| 38 | Chrubasik et al.      | 2010 | Double-blind, P-C, RCT             | Chronic-pain                      | Capsicum               | 130 | 48.9  | Germany     | No  | No  |
| 39 | Schliessbach et al.   | 2017 | Double-blind, P-C, RCT, Cross over | Back, Chronic-pain                | Oxycodone              | 50  | 55    | Switzerland | No  | Yes |
| 40 | Bruehl & Chung        | 2006 | Double-blind, P-C, RCT, Cross over | Low-back, Chronic-pain            | Naloxone               | 119 | 35.1  | USA         | No  | No  |
| 41 | Bruehl et al.         | 2013 | Double-blind, P-C, RCT, Cross over | Low-back, Chronic-pain            | Naloxone+Morphine      | 76  | 37.9  | USA         | No  | No  |
| 42 | Burns et al.          | 2017 | Double-blind, P-C, RCT             | Low-back, Chronic-pain            | Naloxone+Morphine      | 89  | 36.9  | USA         | No  | No  |
| 43 | Eker et al.           | 2016 | Double-blind, RCT                  | Knee, Arthritis, Chronic-pain     | Lidocaine              | 52  | 65.15 | Turkey      | Yes | Yes |
| 44 | Kim et al.            | 2015 | Double-blind, RCT                  | Cancer, Chronic-pain              | Opioid                 | 49  | 62    | Korea       | No  | No  |
| 45 | Kimos et al.          | 2007 | Double-blind, P-C, RCT             | Chronic-pain                      | Gabapentin             | 50  | 33.58 | Canada      | Yes | Yes |
| 46 | Narang et al.         | 2008 | Double-blind, P-C, RCT, Cross over | Chronic-pain                      | Opioid                 | 30  | 43.5  | USA         | No  | No  |
| 47 | Peyton et al.         | 2017 | P-C, RCT                           | Postsurgical, Chronic-pain        | Ketamine               | 80  | 55.3  | Australia   | No  | No  |



|    |                    |      |                                 |                                      |                           |     |       |            |     |     |
|----|--------------------|------|---------------------------------|--------------------------------------|---------------------------|-----|-------|------------|-----|-----|
| 48 | Katz et al.        | 2005 | P-C,RCT,Cross over              | Low-back,Chronic-pain                | Bupropion                 | 60  | 49.8  |            | Yes | Yes |
| 49 | Hashmi et al.      | 2012 | Double-blind,P-C,RCT            | Back,Chronic-pain                    | Lidocaine                 | 30  | 51.36 | USA        | No  | No  |
| 50 | Shimoyama et al.   | 2014 | Double-blind,P-C,RCT,Cross over | Cancer,Chronic-pain                  | Fentanyl                  | 51  | 59.1  | Japan      | No  | No  |
| 51 | Wreje & Brorsson   | 1995 | RCT                             | Chronic-pain                         | Sterile water             | 117 | >=25  | Sweden     | No  | No  |
| 52 | Han et al.         | 2016 | Double-blind,P-C,RCT            | Neuropathic,Chronic-pain             | BTX-A                     | 40  | 53.1  | korea      | Yes | Yes |
| 53 | Rauk et al.        | 2014 | Double-blind,P-C,RCT            | Chronic-pain                         | Hydrocodone               | 510 | 50.4  | USA        | No  | No  |
| 54 | Kim et al.         | 2010 | Double-blind,P-C,RCT            | Postsurgical,Chronic-pain            | Pregabalin                | 94  | 39    | Korea      | No  | No  |
| 55 | Lee et al.         | 2019 | RCT                             | Chronic-pain                         | BTX-A                     | 60  | 50.9  | Korea      | No  | No  |
| 56 | Rashiq et al.      | 2003 | Double-blind,P-C,RCT,Cross over | Low-back,Chronic-pain                | Fentanyl                  | 28  | 54    |            | Yes | Yes |
| 57 | Kang et al.        | 2020 | Double-blind,P-C,RCT            | Postsurgical,Chronic-pain            | Ketamine                  | 168 | 50.8  | korea      | No  | No  |
| 58 | Lipton et al.      | 2021 | P-C,RCT                         | Chronic-pain                         | Erenumab                  | 955 | 41.1  | Canada-13* | No  | No  |
| 59 | Williams et al.    | 2014 | P-C,RCT                         | Low-back,Knee,Arthritis,Chronic-pain | Duloxetine                | 780 | 63.2  | Canada     | No  | No  |
| 60 | Guo et al.         | 2020 | RCT                             | Low-back,Chronic-pain                | Celecoxib Eperisone       | 150 | 36    | China      | No  | No  |
| 61 | Damjanovic et al.  | 2018 | Double-blind,P-C,RCT            | Chronic-pain                         | ACS                       | 32  | 59    |            | No  | No  |
| 62 | Abd-Elshafy et al. | 2019 | Double-blind,RCT                | Postsurgical,Chronic-pain            | Bupivacaine               | 60  | 35    | Egypt      | No  | Yes |
| 63 | Levesque et al.    | 2021 | Double-blind,RCT                | Chronic-pain                         | BTX+Ropivacaine           | 80  | 53.1  |            | No  | No  |
| 64 | Maher et al.       | 2018 | P-C,RCT                         | Chronic-pain                         | Ketamine                  | 79  | 50.32 | USA        | No  | No  |
| 65 | Barry et al.       | 2019 | RCT                             | Back,Chronic-pain                    | Methadone                 | 40  | 37.7  | USA        | No  | No  |
| 66 | Shokeir & Mousa    | 2015 | Double-blind,P-C,RCT            | Chronic-pain                         | Bupivacaine               | 60  | 32.8  | Egypt      | Yes | Yes |
| 67 | Scudds et al.      | 1995 | Double-blind,P-C,RCT            | Chronic-pain                         | Lidocaine                 | 61  | 46.1  | Canada     | No  | No  |
| 68 | Gimbel et al.      | 2016 | Double-blind,P-C,RCT            | Low-back,Chronic-pain                | Buccal buprenorphine      | 510 | 52.8  | USA        | No  | No  |
| 69 | Matsuoka et al.    | 2019 | P-C,RCT                         | Neuropathic,Cancer,Chronic-pain      | Duloxetine                | 70  | 64.7  | Japan      | No  | No  |
| 70 | Yurekli et al.     | 2008 | Double-blind,P-C,RCT            | Chronic-pain                         | Sodium valproate          | 70  | 40    | Turkey     | Yes | Yes |
| 71 | Maarrawi et al.    | 2018 | Double-blind,P-C,RCT            | Chronic-pain                         | Amitriptyline             | 112 | 43.54 | Lebanon    | Yes | Yes |
| 72 | Li et al.          | 2018 | Double-blind,RCT                | Postsurgical,Chronic-pain            | Ropivacaine+Dexamethasone | 52  | 62    | China      | No  | No  |
| 73 | Almog et al.       | 2020 | Double-blind,3-arm,RCT,Cro      | Chronic-pain                         | THC                       | 27  | 48.3  | Israel     | No  | No  |

|    |                    |      | ssover                         |                                   |                        |      |       |             |     |     |
|----|--------------------|------|--------------------------------|-----------------------------------|------------------------|------|-------|-------------|-----|-----|
| 74 | Wyde et al.        | 2015 | Double-blind,RCT               | Postsurgical,Knee,Chronic-pain    | Bupivacaine            | 273  | 66    | UK          | No  | No  |
| 75 | Matsukawa et al.   | 2020 | RCT                            | Chronic-pain                      | Cernitin+Tadalafil     | 100  | 65.9  | Japan       | No  | No  |
| 76 | Haddad et al.      | 2018 | Double-blind,P-C,RCT,Crossover | Chronic-pain                      | Apomorphine            | 35   | 56.2  | Israel      | No  | No  |
| 77 | de Vries et al.    | 2016 | Double-blind,P-C,RCT           | Postsurgical,Chronic-pain         | THC                    | 65   | 52.2  | Netherlands | Yes | Yes |
| 78 | Urquhart et al.    | 2018 | Double-blind,RCT               | Low-back,Chronic-pain             | Amitriptyline          | 146  | 53.5  | Australia   | No  | Yes |
| 79 | Lichtman et al.    | 2018 | Double-blind,P-C,RCT           | Cancer,Chronic-pain               | Nabiximols             | 397  | 59.2  | Belgium-12* | No  | No  |
| 80 | Schiphorst et al.  | 2014 | Trible-Blind,P-C,RCT           | Low-back,Chronic-pain             | Acetaminophen/Tramadol | 50   | 42    | Netherlands | No  | No  |
| 81 | Cardenas et al.    | 2002 | RCT                            | Chronic-pain                      | Amitriptyline          | 84   | 41    | USA         | Yes | Yes |
| 82 | Arnold et al.      | 2012 | Double-blind,P-C,RCT           | Chronic-pain                      | Milnacipran            | 1025 | 49.1  | USA         | No  | No  |
| 83 | Wasan et al.       | 2005 | Double-blind,P-C,RCT,Crossover | Low-back,Chronic-pain             | Morphine               | 20   | 44.2  | USA         | No  | No  |
| 84 | Baron et al.       | 2014 | Double-blind,RCT               | Neuropathic,Low-back,Chronic-pain | Tapentadol/Pregabalin  | 445  | 56.3  | Germany     | No  | No  |
| 85 | Portenoy et al.    | 2007 | Double-blind,P-C,RCT           | Low-back,Chronic-pain             | Fentanyl               | 77   | 48.9  | USA         | No  | No  |
| 86 | Likar et al.       | 1997 | Double-blind,RCT,Crossover     | Arthritis,Chronic-pain            | Morphine               | 21   | 68    | Austria     | No  | No  |
| 87 | Schwartzman et al. | 2009 | Double-blind,P-C,RCT           | Chronic-pain                      | Ketamine               | 20   | 38    | USA         | Yes | Yes |
| 88 | Chu et al.         | 2012 | Double-blind,P-C,RCT           | Back,Chronic-pain                 | Morphine               | 139  | 44    | USA         | Yes | Yes |
| 89 | Sandrini et al.    | 2011 | Double-blind,P-C,RCT           | Chronic-pain                      | BoNTA                  | 56   | 48.5  | USA         | No  | No  |
| 90 | Mahowald et al.    | 2009 | Single-blinded,P-C,RCT         | Arthritis,Chronic-pain            | BoNTA                  | 40   | >=48  | USA         | Yes | Yes |
| 91 | Loftus et al.      | 2010 | Double-blind,P-C,RCT           | Back,Chronic-pain                 | Ketamine               | 102  | 51.7  | Lebanon/USA | Yes | Yes |
| 92 | Lehmann et al.     | 1997 | P-C,RCT                        | Postsurgical,Chronic-pain         | Fentanyl               | 29   | 44.15 | USA         | No  | No  |
| 93 | Kahlenberg et al.  | 2017 | P-C,RCT                        | Chronic-pain                      | Celecoxib              | 98   | 34.2  | USA         | Yes | Yes |
| 94 | Silberstein et al. | 2009 | Double-blind,P-C,RCT           | Chronic-pain                      | Topiramate             | 306  | 38.2  | USA         | No  | No  |
| 95 | Burgher et al.     | 2011 | Double-blind,RCT               | Low-back,Chronic-pain             | Lidocaine              | 26   | 44.1  | USA         | No  | No  |
| 96 | McClean e          | 1999 | Double-blind,P-C,RCT,Crossover | Neuropathic,Chronic-pain          | Phenytoin              | 20   | 40    | Ireland     | Yes | Yes |
| 97 | Naliboff et al.    | 2011 | 2-arm,RCT                      | Chronic-pain                      | Opioid                 | 135  | 52.7  | USA         | No  | No  |

|     |                         |      |                                 |                                             |                           |     |       |                 |     |     |
|-----|-------------------------|------|---------------------------------|---------------------------------------------|---------------------------|-----|-------|-----------------|-----|-----|
| 98  | Booth et al.            | 2017 | P-C,RCT                         | Postsurgical,Chronic-pain                   | Morphine                  | 74  | 28    | USA             | No  | Yes |
| 99  | Lee et al.              | 2006 | Single-blinded,RCT              | Chronic-pain                                | Rowatinex /buprofen       | 50  | 44.2  | Korea           | No  | No  |
| 100 | Levendoglu et al.       | 2004 | Double-blind,P-C,RCT,Cross over | Neuropathic,Chronic-pain                    | Gabapentin                | 20  | 35.9  | Turkey          | Yes | Yes |
| 101 | Yousef & Alzeftawy      | 2018 | Double-blind,RCT                | Chronic-pain                                | Opioid                    | 100 | 53.44 | Egypt           | No  | Yes |
| 102 | Yelland et al.          | 2009 | Double-blind,P-C,RCT,Cross over | Neuropathic,Chronic-pain                    | Gabapentin                | 73  | 57.8  | Australia       | No  | No  |
| 103 | Yucel et al.            | 2004 | Double-blind,P-C,RCT            | Neuropathic,Chronic-pain                    | Venlafaxine               | 55  | 48.94 | Turkey          | No  | No  |
| 104 | Hudson et al.           | 2021 | Double-blind,P-C,RCT            | Knee,Arthritis,Chronic-pain                 | Nortriptyline             | 205 | 64.4  | New Zealand     | Yes | Yes |
| 105 | Rauck et al.            | 2006 | Double-blind,P-C,RCT            | Chronic-pain                                | Ziconotide                | 220 | 52.5  | USA             | No  | No  |
| 106 | Sandner-Kiesling et al. | 2010 | Double-blind                    | Noncancer,Chronic-pain                      | Naloxone+ Oxycodone       | 379 | 56.2  | Austria/Germany | No  | No  |
| 107 | Wang et al.             | 2017 | RCT                             | Chronic-pain                                | Diosmin                   | 300 | 41    | China           | No  | Yes |
| 108 | Hawley et al.           | 2020 | Double-blind,P-C,RCT,Cross over | Cancer,Chronic-pain                         | Lidocaine                 | 25  | 53.76 | Canada          | No  | No  |
| 109 | Mathieson et al.        | 2017 | Double-blind,P-C,RCT            | Chronic-pain                                | Pregabalin                | 209 | 66    | Australia       | No  | No  |
| 110 | Wetzel et al.           | 2015 | Double-blind,P-C,RCT,Cross over | Low-back,Noncancer,Chronic-pain             | Nonopioid analgesic drugs | 36  | 55    | Austria         | No  | No  |
| 111 | Khan et al.             | 2019 | P-C,RCT                         | PostsurgicalNeuropathic,Cancer,Chronic-pain | Lidocaine+ Pregabalin     | 100 | 55.2  | Canada          | No  | No  |
| 112 | Clarke et al.           | 112  | Double-blind,RCT                | Postsurgical,Chronic-pain                   | Gabapentin                | 126 | 58.9  | Canada          | Yes | Yes |
| 113 | Ma et al.               | 113  | Double-blind,P-C,RCT            | Chronic-pain                                | Oxycodone                 | 116 | 58.2  | China           | Yes | Yes |
| 114 | J. H. Lee & C. S. Lee   | 114  | Double-blind,P-C,RCT            | Low-back,Chronic-pain                       | TA-ER                     | 245 | 59.9  | Korea           | No  | No  |
| 115 | Imamura et al.          | 2016 | Triple-Blind,RCT                | Low-back,Chronic-pain                       | Lidocaine                 | 378 | 48.26 | Brazil          | No  | No  |
| 116 | Baron et al.            | 2015 | RCT                             | Neuropathic,Low-back,Chronic-pain           | Tapentadol                | 258 | 58.1  | Germany         | No  | No  |
| 117 | Kim et al.              | 2017 | Double-blind,RCT                | Postsurgical,Cancer,Chronic-pain            | Lidocaine+ Magnesium      | 126 | 48.7  | Korea           | Yes | Yes |
| 118 | Iwamura et al.          | 2015 | RCT                             | Chronic-pain                                | Eviprostat                | 100 | 50.1  | Japan           | No  | No  |
| 119 | Zhang et al.            | 2021 | Double-blind,P-C,RCT            | Chronic-pain                                | Ningmitai                 | 120 | 33.7  | China           | No  | No  |

310 Canada-13\*: "Canada-13" was used as the group of 13 countries: "Canada, Austria, Belgium, Czech Republic, Finland,  
 311 Germany, Poland, Slovakia, Sweden, the United Kingdom, Turkey, the Netherlands and USA".  
 312 Belgium-12\*: "Belgium-12" was used as the group of 12 countries: "Belgium, Bulgaria, Czechia, Germany, Hungary, Latvia,  
 313 Lithuania, Poland, Puerto Rico, Romania, United Kingdom, United States".  
 314

315  
316  
317

Table 2 Summary of drug and pain types included in systematic review

| <b>Summary of drug and pain types included in studies systematic review</b> |                        |                            |                                 |
|-----------------------------------------------------------------------------|------------------------|----------------------------|---------------------------------|
| <b>Classes</b>                                                              | <b>Drug types</b>      | <b>Studies (Number, %)</b> | <b>Participants (Number, %)</b> |
| Opioids<br>32 (26.89%)                                                      | Oxycodone              | 4 (3.36%)                  | 643 (3.63%)                     |
|                                                                             | Fentanyl               | 4 (3.36%)                  | 185 (1.04%)                     |
|                                                                             | Methadone              | 1 (0.84%)                  | 40 (0.23%)                      |
|                                                                             | Morphine               | 9 (7.56%)                  | 750 (4.24%)                     |
|                                                                             | Buprenorphine          | 2 (1.68%)                  | 659 (3.72%)                     |
|                                                                             | Codeine                | 1 (0.84%)                  | 58 (0.33%)                      |
|                                                                             | Other Opioids          | 11 (9.24%)                 | 3183 (17.97%)                   |
| Nonopioids                                                                  | Naloxone               | 8 (6.72%)                  | 1084 (6.12%)                    |
|                                                                             | Gabapentin             | 8 (6.72%)                  | 610 (3.44%)                     |
|                                                                             | Lidocaine              | 10 (8.4%)                  | 1036 (5.85%)                    |
|                                                                             | Ketamine               | 5 (4.2%)                   | 449 (2.54%)                     |
|                                                                             | Amitriptyline          | 3 (2.52%)                  | 342 (1.93%)                     |
|                                                                             | Bupivacaine            | 4 (3.36%)                  | 409 (2.31%)                     |
|                                                                             | THC                    | 3 (2.52%)                  | 109 (0.62%)                     |
|                                                                             | Others                 | 54 (45.38%)                | 9251 (52.24%)                   |
| <b>Categories</b>                                                           | <b>Pain types</b>      | <b>Studies (Number, %)</b> | <b>Participants (Number, %)</b> |
| Chronic Pain                                                                | Postsurgical           | 19 (15.97%)                | 1987 (11.22%)                   |
|                                                                             | Neuropathic            | 10 (8.4%)                  | 1171 (6.61%)                    |
|                                                                             | Low Back               | 26 (21.85%)                | 4626 (26.12%)                   |
|                                                                             | Cancer                 | 8 (6.72%)                  | 908 (5.13%)                     |
|                                                                             | Back (Except Low-Back) | 13 (10.92%)                | 1068 (6.03%)                    |
|                                                                             | Knee                   | 4 (3.36%)                  | 1310 (7.4%)                     |
|                                                                             | Arthritis              | 7 (5.88%)                  | 1369 (7.73%)                    |
|                                                                             | Pelvic                 | 4 (3.36%)                  | 300 (1.69%)                     |
|                                                                             | Other Chronic Pain     | 42 (35.29%)                | 8578 (48.44%)                   |

318  
319

### *Pairwise Meta-Analysis (PMA)*

321

322 The PMA included 24 studies with pairwise comparisons between drugs and a placebo. The  
323 experimental and control group comprised of "Amitriptyline", "BTX-A", "Gabapentin",  
324 "Ketamine", "Lidocaine", "Morphine", "Naloxone" and a placebo, respectively. A single study  
325 reported "Fentanyl", "Ningmitai", "THC", and "Oxycodone".

326

### *PMA for Baseline Pain Score*

327

328

329 The PMA was used to test baseline pain score differences between the experimental and  
330 control group in 18 studies which comprised of a total sample of 1,691 participants. The  
331 experimental and control groups comprised of 837 and 854 participants, respectively, with a

332 pooled mean difference (MD) of -0.02 (95% CI = [-0.13, 0.08]). The 95% CI was 0 and  
 333 therefore, no statistically significant difference between baseline pain scores of two groups.  
 334 [Figure 1]. A weak statistical heterogeneity of 15% of  $I^2$  ( $p = 0.26$ ) was determined. This  
 335 combined with the statistical insignificance indicates the randomisation of was completed  
 336 accurately and that it is scientifically justifiable to use the post-treatment pain scores directly  
 337 as the outcomes to evaluate treatment effects.  
 338

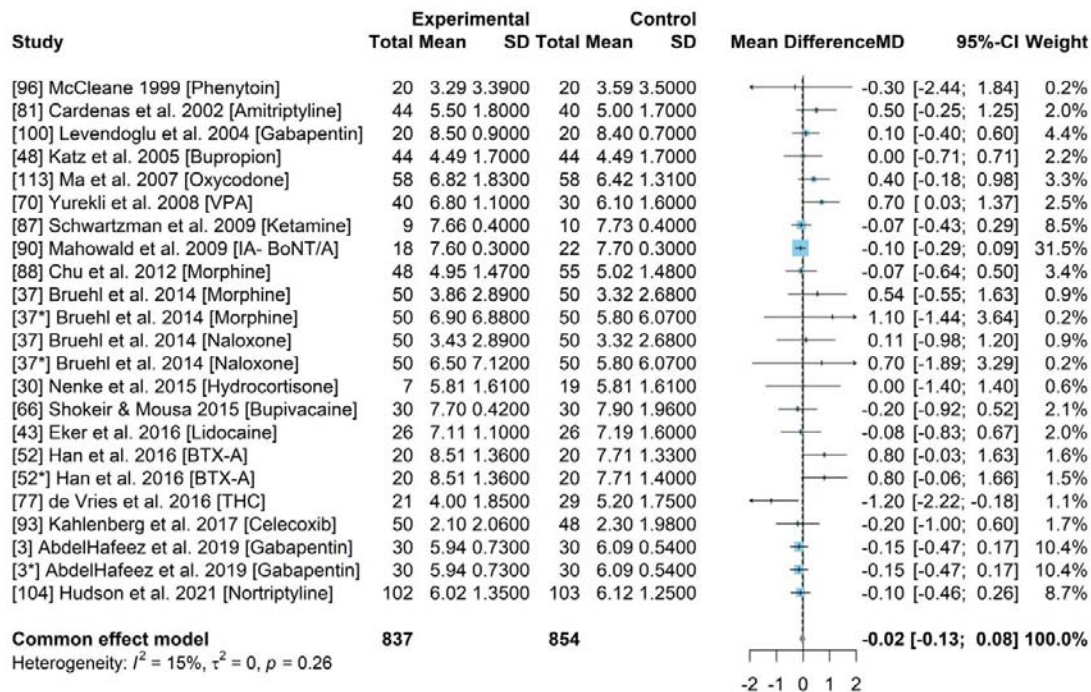

339  
 340 Figure 1. Forest plot for the baseline pain scores of experimental group and control group across 18  
 341 studies.  
 342

343 *PMA for drug efficacy between NSAID compared to a placebo*

344  
 345 This PMA included 24 studies [Figure 2] with 2418 participants, with a MD of -0.89 (95% CI  
 346 = [-1.31, -0.47]). The experimental and control group comprised of 1219 and 1199,  
 347 respectively. A significant statistical heterogeneity of 92% of  $I^2$  ( $p$ -value  $< 0.01$ ) was  
 348 identified. Mean difference (MD) was calculated to assess if there is statistically significant  
 349 difference of post-treatment pain scores between experimental group and control group. The  
 350 95% CI was less than 0 which indicated a significant treatment effect with a reduction in pain  
 351 by 0.89-point (0-10 scale) compared to those who were given a placebo.  
 352

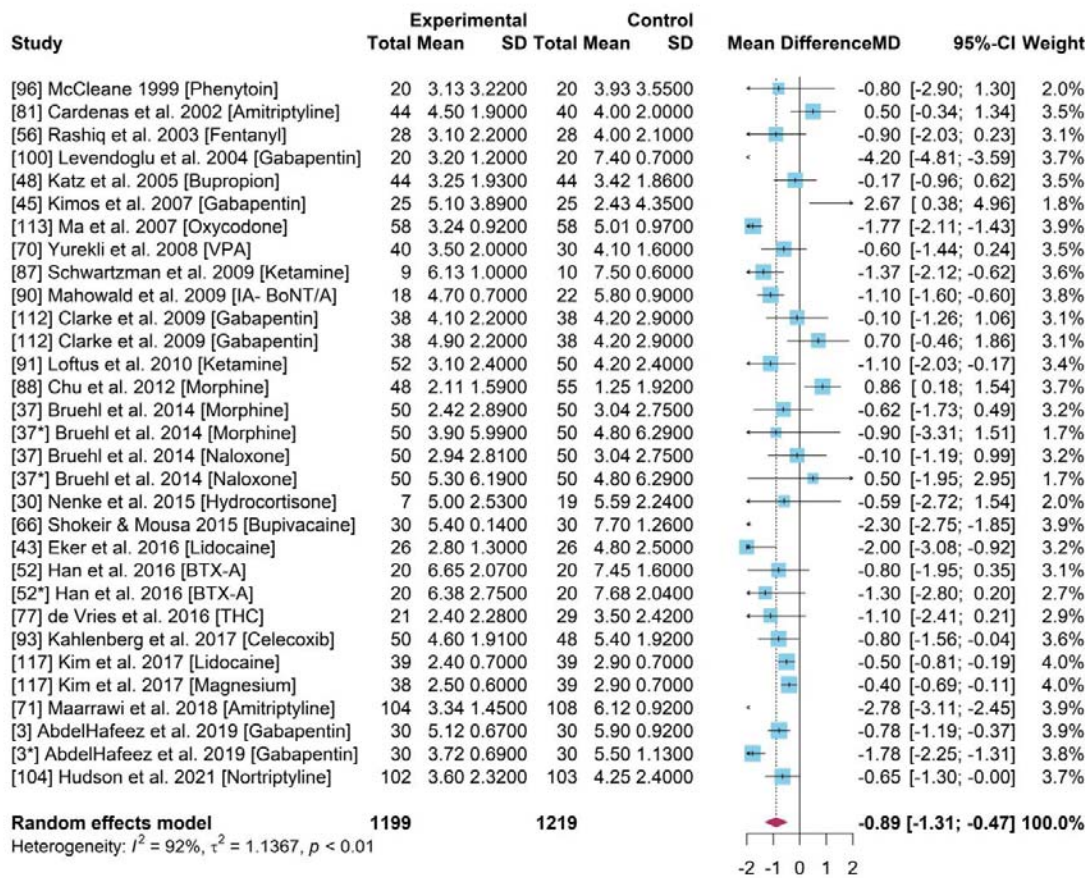

Figure 2. Forest plot for the pain scores of experimental group and control group across 24 studies testing all NSAID drugs (including some unnamed Opioids drugs).

### Meta-Analyses

A statistically low heterogeneity of 0% of  $I^2$  ( $p$ -value  $> 0.5$ ) was identified among studies with *BTX-A*, *Ketamine* and *Naloxone* [Figure 3b and 3d]. *BTX-A* [Figure 3b] and *Ketamine* [Figure 3d] indicated statistically significant drug efficacy of  $-1.07$   $[-1.51, -0.64]$  and  $-1.26$   $[-1.85, -0.68]$ , respectively. The treatment efficiency compared to the placebo had a 1 point pain reduction within a 0-10 evaluation scale. Ketamine demonstrated optimal efficacy with a 1.26 point pain reduction on average.

The PMA for *BTX-A* (Figure 3b) and *Naloxone* (Figure 3g) showed a low heterogeneity as the data was pooled from a single study.

Studies on *Amitriptyline*, *Gabapentin*, *Lidocaine* and *Morphine* had a high heterogeneity and a statistically insignificant drug efficacy (Figure 3a, c, e, f). The mean difference of 95% CI was 0 indicating an insignificant treatment difference between the drugs and placebo based on the random effects model.

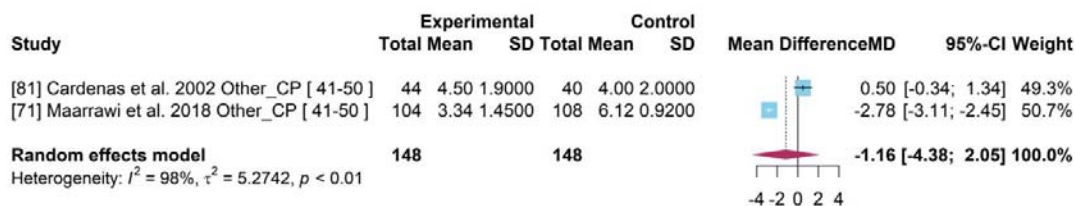

Figure 3a. Forest plot for drug efficiency of Amitriptyline.

377  
378  
379  
380

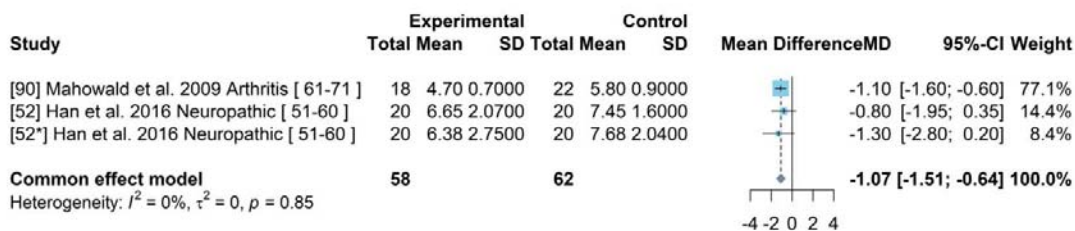

Figure 3b. Forest plot for drug efficiency of BTX-A.

381  
382  
383

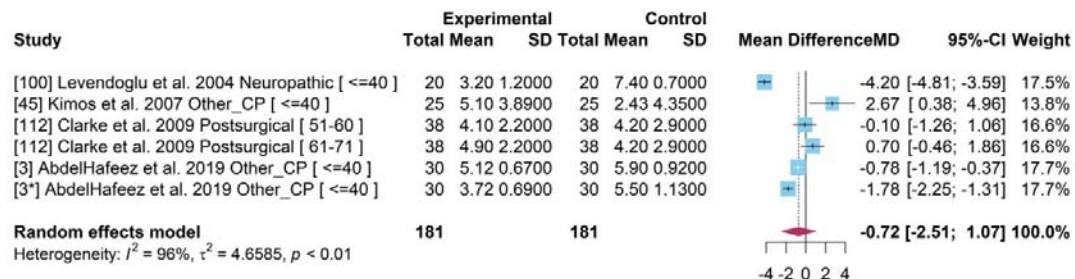

Figure 3c. Forest plot for drug efficiency of Gabapenin.

384  
385  
386

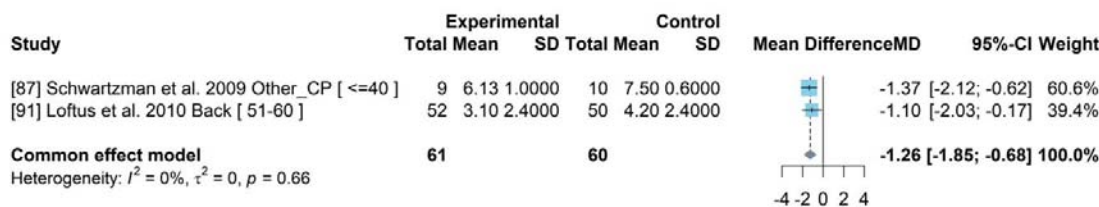

Figure 3d. Forest plot for drug efficiency of Ketamine.

387  
388  
389

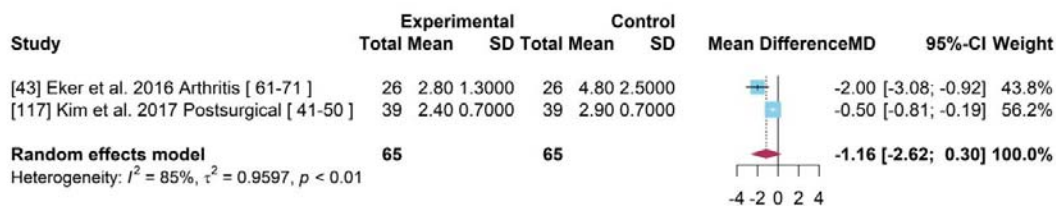

Figure 3e. Forest plot for drug efficiency of Lidocaine.

390  
391

392  
393

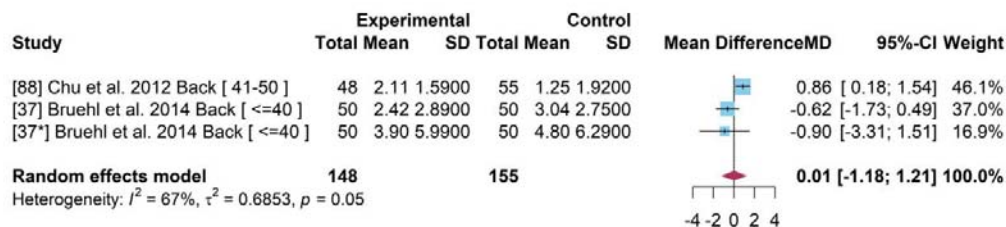

Figure 3f. Forest plot for drug efficiency of Morphine.

394  
395  
396

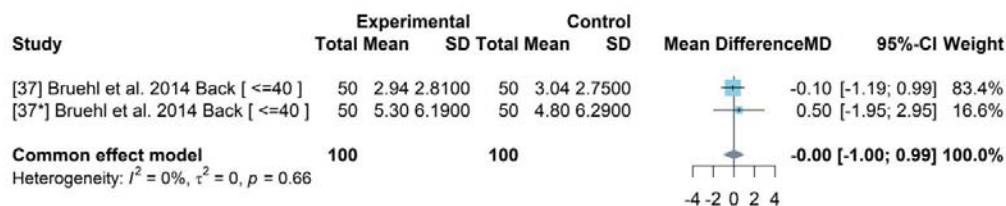

Figure 3g. Forest plot for drug efficiency of Naloxone.

397  
398  
399  
400  
401

### Opioids drugs

402 A meta-analysis was conducted with 4 studies with Opioids [Figure 4]. A pooled MD of -0.65  
403 and a 95% CI [-1.67, 0.37] was determined indicating an insignificant treatment effect of  
404 opioids drugs compared to a placebo. A statistically significant heterogeneity of 92% of  $I^2$  (p-  
405 value < 0.01) was identified.  
406  
407

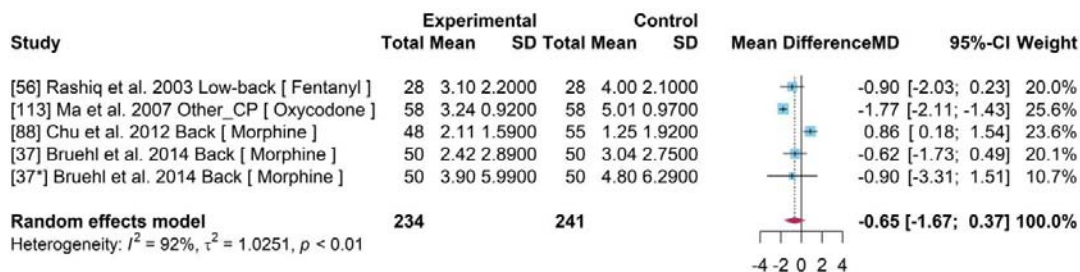

Figure 4. Forest plot for drug efficiency of Opioids drugs\*.

408  
409  
410  
411  
412  
413  
414  
415  
416  
417  
418  
419  
420  
421  
422



423 *Network Meta-analysis (NMA)*

424

425 A NMA [Figure 5] was completed for 34 studies. The nodes correspond to each intervention  
426 included within the network where the interventions with direct comparisons are linked with a  
427 line. The thickness of lines corresponds to the number of trials evaluating the comparison. A  
428 connected network was built based on the *placebo* which was mostly *Tolterodine* based on  
429 the original studies. The evaluations between interventions were supported by direct  
430 comparison and indirect comparison

431

432

Opioids drugs\*: including Fentanyl, Oxycodone, Morphine and other unnamed Opioids drugs.

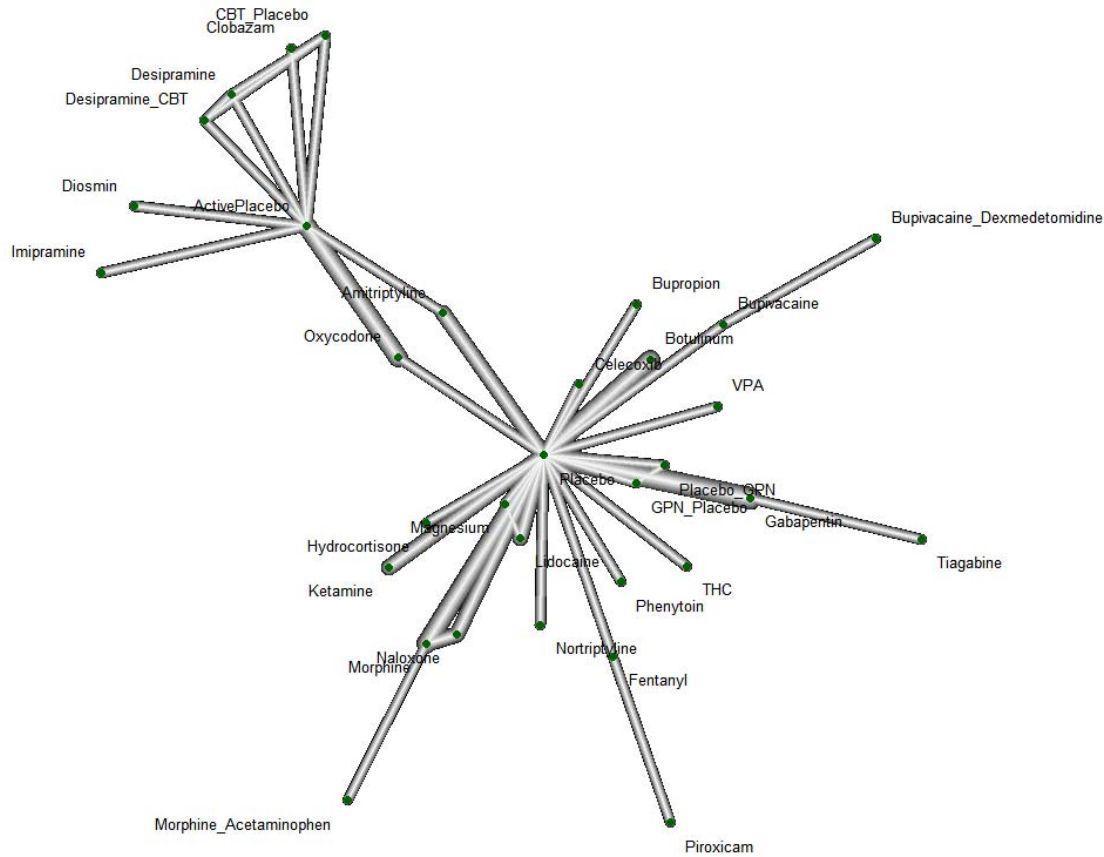

433

434 Figure 5 Network plot where Placebo was the reference group with 34 studies and 32 interventions.

435

436

437

438

439

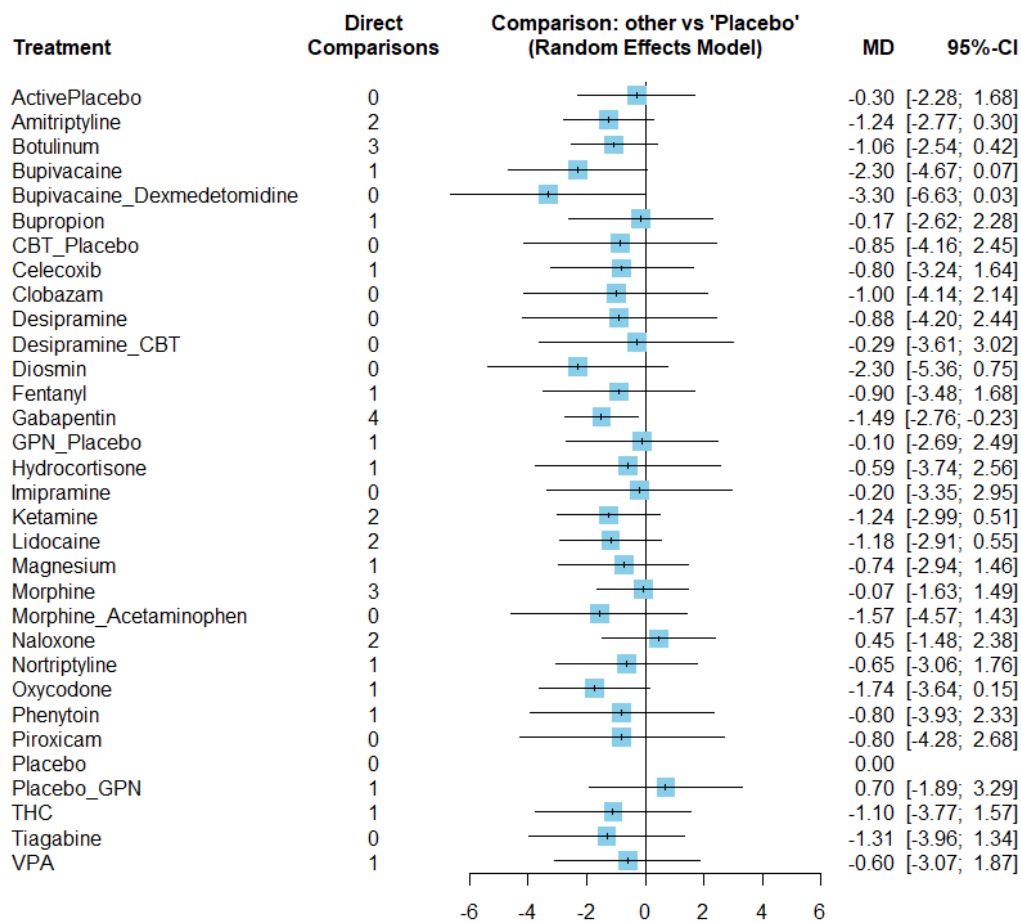

440

441

Figure 6 Forest plot for intervention efficiency compared to Placebo in NMA

442

443 In the network with the placebo as the reference group, *Gabapentin* [Figure 6] comprised of  
 444 a MD equaling to -1.49 (95% CI = [-2.76, -0.23], p-value < 0.05) indicating a significant effect  
 445 on reducing chronic pain and direct comparisons were made using 4 studies [Figure 7a]. The  
 446 pooled MD of *Botulinum* and *Ketamine* were -1.06 and -1.24, respectively. These were  
 447 similar to the results in the PWA, but their 95% CI was 0 therefore showed insignificant effect  
 448 on pain reduction compared to a placebo. Most combined interventions had a negative MD  
 449 compared to a placebo with a 95% CI of 0 indicated statistically insignificant results for  
 450 reducing pain.

451

452 *Imipramine*, *Diosimin*, *Desipramine*, *Clobazam*, *Piroxicam* and *Tiagabine* had not been  
 453 directly compared to a placebo based on the identified data therefore the comparative  
 454 treatment effected between them and a placebo was not possible to complete.

455

456

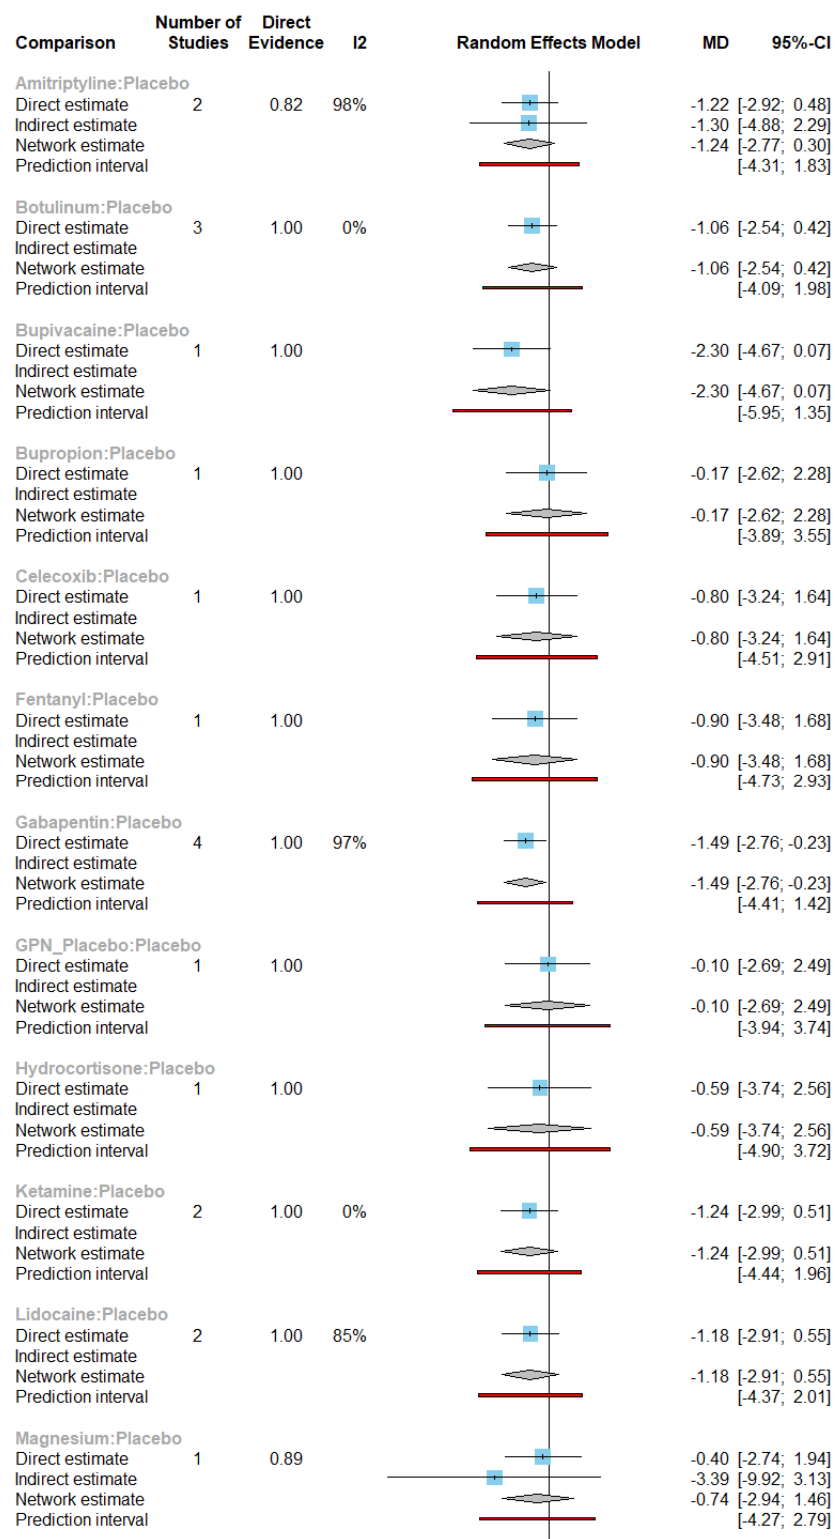

457  
458  
459  
460  
461

Figure 7a Forest plot for intervention efficiency compared to Placebo in NMA with detailed direct and indirect comparisons

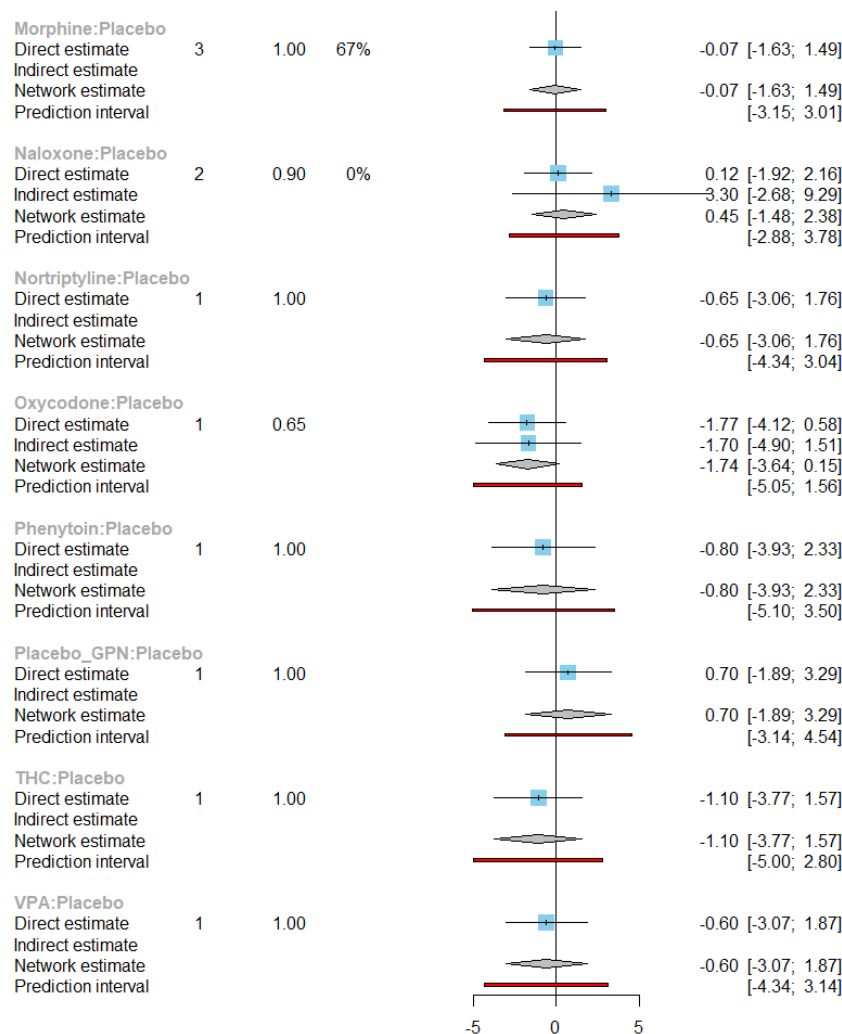

462

463 Figure 7b Forest plot for intervention efficiency compared to Placebo in NMA with detailed direct and  
 464 indirect comparisons

465

466

467

### 467 Subgroup Analysis

468

469

470 A subgroup analyses was conducted for 24 studies within the meta-analysis to explore the  
 471 sources of heterogeneity and unbiased estimation based on age, pain type, period and  
 472 geographical location [Figure 8]. The sub-group analysis for pain type, time period and  
 473 geographical location can be found in the supplementary file whilst average age is shown  
 474 below.

474

475

#### 475 Subgroup analysis for pain ccore difference based on different age groups

476

477

478 It showed that the heterogeneity among studies with participants who were older than 50  
 479 years old had changed with decreased  $I^2$  ( $I^2 = 48%$  for “51-60”,  $I^2 = 68%$  for “61-71”). A  
 480 common effects model was chosen for subgroup “51-60”, which produced a higher  
 481 estimation of pain reduction with a mean difference of -1.46 (95% CI = [-1.74, -1.18]). Based  
 on the high heterogeneity ( $I^2 > 50%$ ), random effects models were built for other

482 subgroups. The group with participants younger than 40 years older obtained a significant  
 483 drug efficiency (MD = -1.05, 95% CI = [-1.85, -0.24]). The pooled drug effects [Figure 8] in  
 484 the 41-50 and 61-71 years of age groups were much lower than the overall treatment effect  
 485 of NSAID drugs identified in the PMA. The 95% CI of 0 indicated statistically ineffective  
 486 compared to the placebo. The random effects models showed the decrease of heterogeneity  
 487 indicating that age may be a source of heterogeneity.

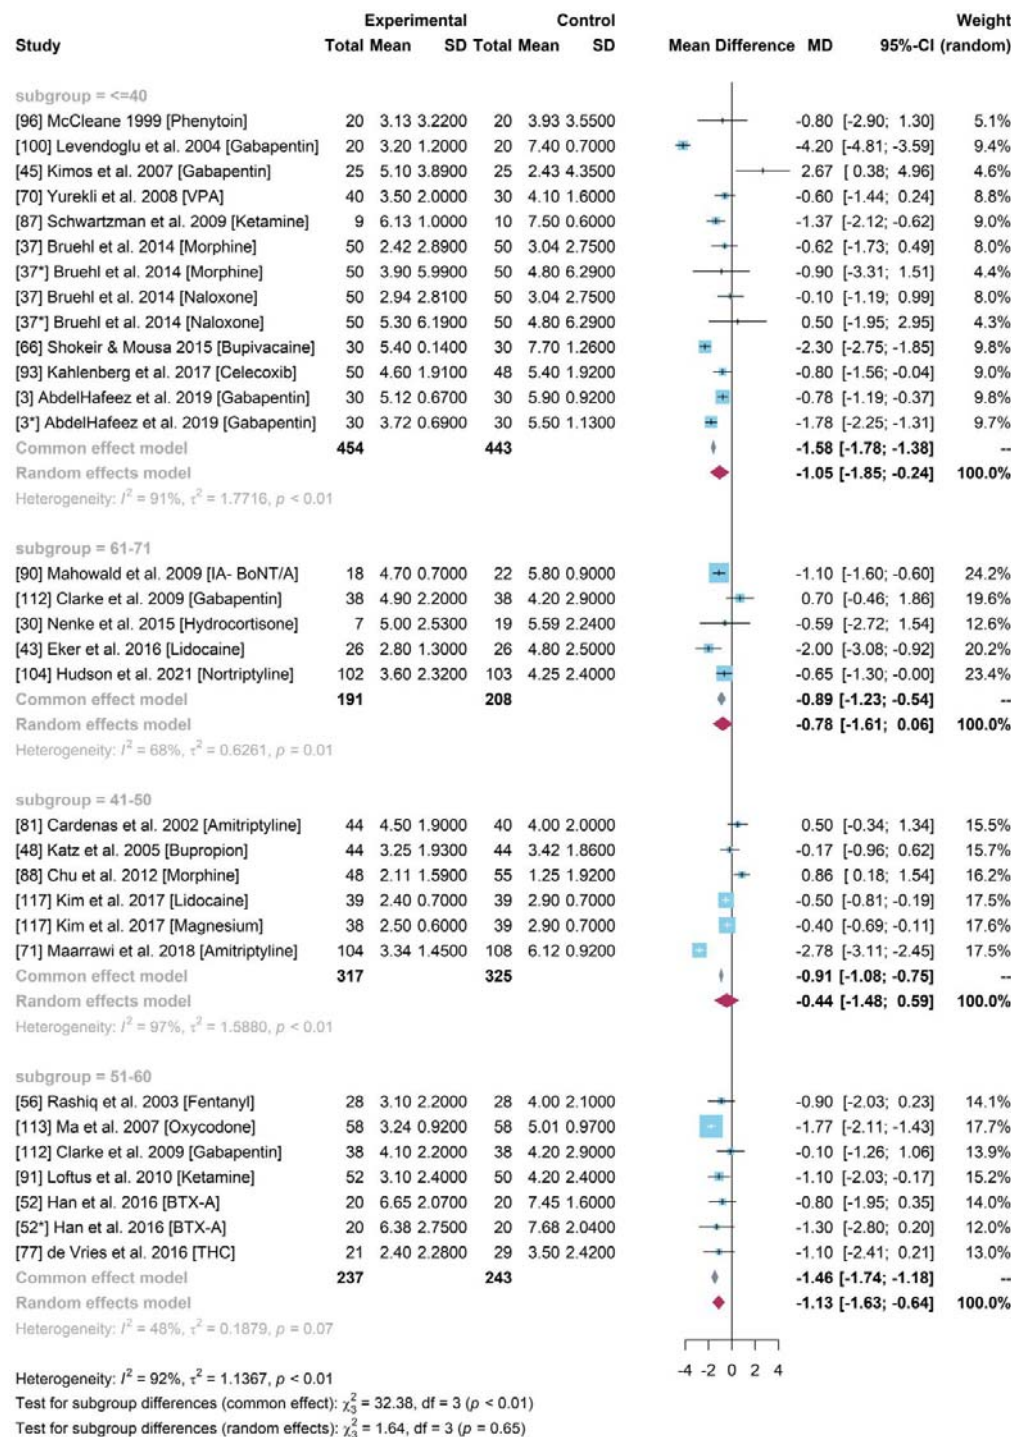

Figure 8. Forest plot for the mean difference of pain scores between experimental group and control group across different mean age of participants.

491 **Sensitivity Analysis**

492

493 The sensitivity analysis was conducted [Figure 12] for the PMA where some studies  
 494 influenced the pooled results compared to the overall estimation (-0.89). To test this theory,  
 495 study number 71 and 100 were omitted and the pooled results were much lower, -0.82 and -  
 496 0.79, respectively. Studies with *Amitriptyline* and *Gabapentin* produced unstable treatment  
 497 results, and the absence of these showed an overestimation ( study 81, 45) or  
 498 underestimates ( study 71, 100). Collectively, the high heterogeneity ( $I^2 = 92\%$ , p-value <  
 499 0.01) was stable and a robust treatment effect with negative mean differences and a  
 500 significant 95% CI remained. Therefore, the pooled treatment effects identified was credible.

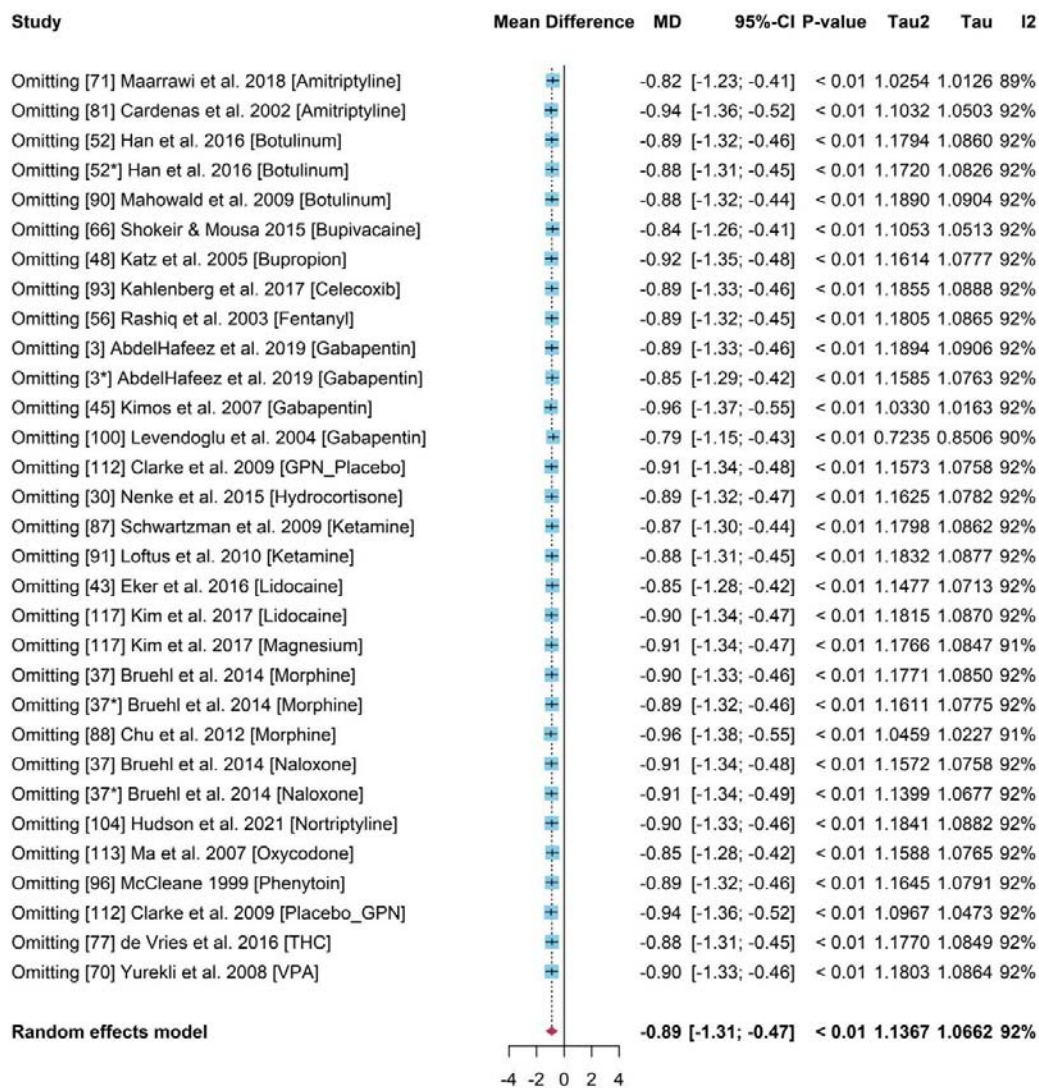

501  
 502  
 503  
 504  
 505  
 506  
 507

Figure 12 Forest plot for Sensitivity Analysis with studies in MA

508 *Publication bias*

509

510 The funnel plots [Figure 13] within the PMA indicated symmetry. Although several studies  
511 were not within the remit of the funnel, the Egger's test showed a p value (0.22) larger than  
512 0.05 which indicated the lack of small-study effects.

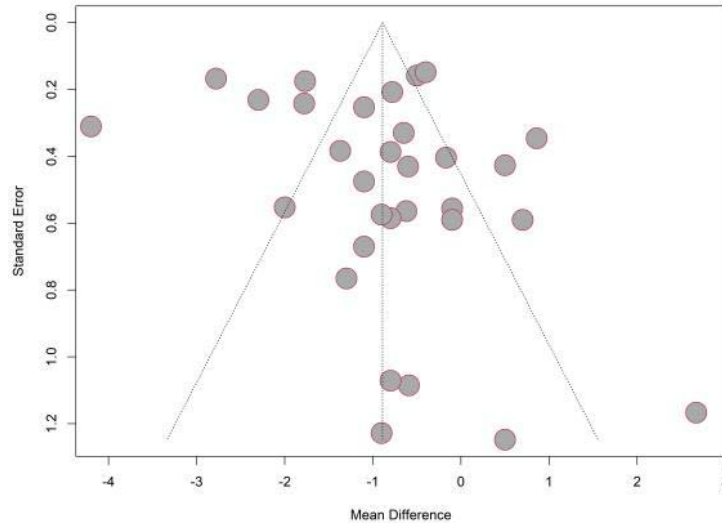

Figure 13 Funnel plot for studies used in PMA

513

514

515

516

517

518

Table 5 Egger test results for studies used in PMA

|                   |                                     |         |           |              |
|-------------------|-------------------------------------|---------|-----------|--------------|
| Test result:      | t = 1.24, df = 29, p-value = 0.2247 |         |           |              |
|                   | bias                                | se.bias | intercept | se.intercept |
| Sample estimates: | 1.49                                | 1.2     | -1.593    | 0.3737       |

519

520

521

522

523

524 **Discussion**

525

526 We identified opioids and non-opioids were the two primary classes of pharmacological  
527 interventions in chronic pain management. The long-term use of opioids in the management  
528 of chronic non-malignant pain has come under scrutiny over the last few years and is now  
529 recommended that it should be offered only if benefits of initiating treatment would  
530 significantly outweigh the potential risks, and possibly as an adjunct to the primary  
531 intervention<sup>[30]</sup>. Our study has shown that judicious use of non-opioid medications along with  
532 other treatment modalities could provide better outcomes in managing chronic pain thereby  
533 removing long-term side-effects observed during opioid therapy. Opioids are widely used in  
534 the management of cancer pain and also non-cancer associated pain <sup>[25,26]</sup> However, recent  
535 evidence also indicates that opioids provide limited advantage in managing chronic non-  
536 cancer pain and have similar efficacy to non-opioids.<sup>[29]</sup> The awareness of an opioid crisis

537 globally has prompted clinicians to exercise caution in their prescription habits, but the WHO  
538 supports the use of opioids including Fentanyl and Methadone as an essential class of  
539 medication for the management of cancer pain<sup>[27,28]</sup>.

540

541 The meta-analysis of baseline pain scores lacked statistical significance between  
542 experimental and control groups. The significant reduction in chronic pain scores of patients  
543 taking NSAID versus non-steroidal opioid drugs compared to patients given placebo under a  
544 random effects model. The presence of a significant drug efficiency with *BTX-A* and  
545 *Ketamine* is interesting although the pooled results of other drugs and interventions had  
546 statistically insignificant results with a 95% CI of 0. The pooled evidence indicated Ketamine  
547 showed the highest pain reduction (1.26) followed by BTX-A (0.98). Studies testing on other  
548 drugs including Amitriptyline, Gabapentin, Morphine and Lidocaine had a high heterogeneity  
549 and insignificant drug efficiency. Overall, evidence from the PMA showed a strong efficacy  
550 within the NSAIDs group with managing pain which were remarkably narrowed when  
551 exclusive trials with low risk of bias were included<sup>[11]</sup>.

552

553 Many cancer patients are increasingly being cured or achieve long term remission, and  
554 prolonged use of opioids could result in aberrant behaviour and dependence, thus limiting  
555 opioid use to patients with a terminal illness or as part of end-of-life care. The CDC  
556 recommends the use of non-pharmacological therapies and non-opioid pharmacotherapy as  
557 the primary intervention in patients with chronic pain, and opioids should be offered only if  
558 benefits of initiating treatment significantly outweigh the potential risks and if possible, these  
559 should be used as an adjunct to the primary intervention.<sup>[30]</sup> In this study, a pairwise meta-  
560 analysis and NMA consolidating the evidence of 46 studies was carried out, with the former  
561 comparing several different opioids. Morphine has traditionally been used for the  
562 management of moderate to severe chronic pain.<sup>[33]</sup> Despite morphine being a potent  
563 analgesic [MD = 0.01 (95% CI=[-1.18,1.21]), newer opioids are now being employed owing to  
564 their superior safety profile. Oxycodone and Fentanyl appear to be popular due to better  
565 availability and vast clinical experience including the well accepted effectiveness  
566 demonstrated, as per patient and clinically reported outcomes. Our results are aligned to  
567 these trends where the effectiveness is shown to include a MD 1.77 (95% CI=[-2.11,-1.43])  
568 for Oxycodone and a MD of -0.90 (95% CI=[-2.03,0.23]) for Fentanyl.<sup>[32]</sup> However,  
569 untoward gastrointestinal effects (constipation, nausea, and vomiting) still remain a major  
570 concern with opioid use and are often responsible for discontinuation of treatment.<sup>[34,35]</sup>

571 Recent evidence favours the use of a combination of oxycodone and naloxone in patients  
572 with chronic pain (after ensuring that there is no cause for porto-systemic anastomosis), to  
573 offer an improved bowel function without any effective change in analgesia.<sup>[36]</sup> The concerns  
574 of developing tolerance, opioid-induced hyperalgesia, aberrant behaviour and dependence  
575 with opioids is a pragmatic reason to develop effective alternative treatment modalities  
576 especially for vulnerable individuals. In pairwise comparison, we observed Ketamine to be  
577 superior to other pharmacological interventions with a mean difference MD -1.26 (95% CI=[-  
578 1.85,-0.68]).

579

580 There are several guidelines recommending the use of Pregabalin, Gabapentin, Duloxetine,  
581 and Amitriptyline as first line drugs in the management of neuropathic pain<sup>[37]</sup>. However, the  
582 use of gabapentinoids is being challenged as it lacks favourable robust evidence for efficacy  
583 against pain syndromes other than fibromyalgia, post herpetic neuralgia and diabetic  
584 neuropathy, and many clinicians have also highlighted the potential for misuse and



585 developing dependence<sup>[38,39,40]</sup>. The use of BTX-A, Ketamine, Ningmitai and THC for the  
586 management of various chronic pain conditions is popular and well established<sup>[12,13,14,15]</sup> and  
587 our study shows the effective use of these as analgesics when compared to placebo. There  
588 is evidence to support the efficacy of BTX-A for the management of neuropathic pain  
589 although the sample sizes used in the studies were small and therefore the real-world  
590 applicability remains limited<sup>[16]</sup>. BTX-A is also used in management of myofascial pains<sup>[17,18]</sup>  
591 although further evidence on the efficacy and tolerability within all populations, especially  
592 those with existing co-morbidities needs to be evaluated. Ketamine was found to be  
593 beneficial in managing some neuropathic pains<sup>[19]</sup> and as an infusion the rates of serious  
594 adverse effects were found to be similar to placebo.<sup>[20] 3,24]</sup> Further studies are required to  
595 gather evidence to better understand its psychedelic effects and its role in the management  
596 of PTSD, anxiety and depression . A renewed use of magnesium in managing chronic pain  
597 has been demonstrated in some literature.<sup>[50]</sup> Our results indicate similar evidence in the use  
598 of magnesium, but will require further research to determine the efficacy, safety and  
599 effectiveness in managing short, medium and long-term pain.

600

601 The NMA provided more reliable results with direct and indirect comparisons between  
602 different drugs under different study designs. However, only a small number of multi-arm  
603 trials were eligible and the distribution of trials studying different drugs was uneven. It  
604 resulted in the lack of direct evidence of certain drugs and their relative efficacy in the  
605 network was unstable due to excessive reliance on indirect comparisons. Therefore, well  
606 designed and robust clinical trials should be conducted to verify the efficacy of  
607 pharmaceutical interventions used in chronic pain management.

608

## 609 **Conclusion**

610 To the best of our knowledge, this is the first pairwise MA and NMA reporting the synthesis  
611 of the prevalence of the efficacy of pharmacological treatments used in the management of  
612 chronic pain with a large sample size of 17,708 participants. Management of long-term  
613 chronic pain needs to be prioritised for several reasons including humanitarian, the strain on  
614 the healthcare systems and the impact on the economy due to loss of productivity. The use  
615 of pharmaceutical agents in the long-term management of chronic pain has been debated for  
616 several decades, yet there has not been a consensus on this matter. This study supports  
617 the importance of generating better evidence by way of robust clinical trials, the need for  
618 drafting clinical guidelines that is pragmatic, practical as well as clinically significant and the  
619 use of better data-connectivity methods to improve clinical practice in the real-world.

620

621

622

623

624

625

626

627

628

629

630

631 Appendix

632

Table 6 Interventions used in studies

| Study_Number | Author                | Intervention Abbreviation     | Intervention Details                                                                                                                                                              |
|--------------|-----------------------|-------------------------------|-----------------------------------------------------------------------------------------------------------------------------------------------------------------------------------|
| 1            | Weizman et al.        | THC                           | Cannabis                                                                                                                                                                          |
| 2            | Krebs et al.          | Opioid                        | opioid and nonopioid medication therapy                                                                                                                                           |
| 3            | AbdelHafeez et al.    | Gabapentin                    | Gabapentin 2700 mg daily                                                                                                                                                          |
| 4            | Bushey et al.         | Opioid                        | analgesic                                                                                                                                                                         |
| 5            | Bruehl et al.         | Morphine + Naloxone           | Morphine and Naloxone                                                                                                                                                             |
| 6            | Worley et al.         | Buprenorphine/Naloxone        | Buprenorphine/naloxone                                                                                                                                                            |
| 7            | Dindo et al.          | ACT                           | Acceptance and Commitment Therapy                                                                                                                                                 |
| 8            | Hruschak et al.       | IPGT                          | psychoeducation, motivational interviewing, cognitive behavioral therapy, mindfulness, and peer support                                                                           |
| 9            | Azevedo et al.        | Opioid                        | Opioid                                                                                                                                                                            |
| 10           | Gudin et al.          | NKTR-181                      | NKTR-181 administered at doses of 100–600 mg twice daily                                                                                                                          |
| 11           | Stahl et al.          | Venlafaxine                   | lower-dose venlafaxine ( $\leq 150$ mg/d)                                                                                                                                         |
| 12           | Schliessbach et al.   | Imipramine                    | imipramine 75                                                                                                                                                                     |
| 13           | Mohamed et al.        | Morphine                      | topical morphine (in 1 of 3 doses: 5, 10, or 15 mg)                                                                                                                               |
| 14           | Schliessbach et al.   | Oxycodone+Imipramine+Clobazam | Oxycodone 15 mg, imipramine 75 mg, clobazam 20 mg                                                                                                                                 |
| 15           | Hermans et al.        | Naloxone                      | 0 mg morphine or 0.2 mg/mL Naloxone) and placebo (2 mL Aqua) group.                                                                                                               |
| 16           | Todorov et al.        | Gabapentin+Tiagabine          | Gabapentin and Tiagabine                                                                                                                                                          |
| 17           | Sadatsune et al.      | Gabapentin                    | Gabapentin Group received 600 mg of gabapentin preoperatively, one hour prior to surgery, and Control Group received placebo.                                                     |
| 18           | Edwards et al.        | Opioid                        | oral opioid therapy,                                                                                                                                                              |
| 19           | Katz et al.           | Naproxen+Tanezumab            | intravenous tanezumab 200 $\mu$ g/kg plus oral placebo (n=88), intravenous placebo plus oral naproxen 500 mg twice a day (n=88), or intravenous placebo plus oral placebo (n=41). |
| 20           | Hayek et al.          | Opioid+Bupivacaine            | opioid with bupivacaine                                                                                                                                                           |
| 21           | Schliessbach et al.   | Clobazam                      | received a single oral dose of clobazam 20 mg or active placebo tolterodine 1 mg                                                                                                  |
| 22           | Bruehl et al.         | Opioid                        | Opioid                                                                                                                                                                            |
| 23           | Kim et al.            | Nefopam                       | infused with the same volume of saline or nefopam (0.2 mg/kg bolus, 120 $\mu$ g/kg/h continuous infusion) during surgery                                                          |
| 24           | Eisenach et al.       | Ketorolac                     | drug administration                                                                                                                                                               |
| 25           | Rauck et al.          | Adenosine/Clonidine           | intrathecal clonidine, 100 $\mu$ g, or adenosine, 2 mg                                                                                                                            |
| 26           | Buchheit et al.       | Valproate                     | oral valproic acid                                                                                                                                                                |
| 27           | Papadokostakis et al. | Calcitonin                    | 200 IU intranasal salmon calcitonin and 1,000 mg of oral calcium daily                                                                                                            |
| 28           | Gould et al.          | Desipramine                   | desipramine titrated to reach a serum concentration level of 15 to 65 ng/mL;                                                                                                      |

|    |                     |                        |                                                                                                                                                     |
|----|---------------------|------------------------|-----------------------------------------------------------------------------------------------------------------------------------------------------|
| 29 | Schnitzer et al.    | D-cycloserine          | D-cycloserine                                                                                                                                       |
| 30 | Nenke et al.        | Hydrocortisone         | 10 mg/m <sup>2</sup> /day of oral hydrocortisone in three divided doses o                                                                           |
| 31 | Sopata et al.       | Opioid                 | opioids                                                                                                                                             |
| 32 | Kendall et al.      | Lidocaine              | 1.5 mg/kg bolus of intravenous lidocaine followed by a 2 mg/kg/hour infusion                                                                        |
| 33 | Hongo et al.        | Risedronate+Elcatonin  | risedronate plus elcatonin                                                                                                                          |
| 34 | Amr & Yousef        | Venlafaxine+Gabapentin | Venlafaxine 37.5 mg/d, gabapentin 300 mg/d                                                                                                          |
| 35 | Pedersen et al.     | Codeine+Paracetamol    | 30 mg codeine and 400 or 500 mg of paracetamol                                                                                                      |
| 36 | Choi et al.         | Lidocaine              | The patients received 2 mg/kg of lidocaine followed by continuous infusions of 3 mg/kg/h of lidocaine                                               |
| 37 | Bruehl et al.       | Morphine+Naloxone      | naloxone (8 mg), morphine (0.08 mg/kg)                                                                                                              |
| 38 | Chrubasik et al.    | Capsicum               | cream containing capsaicin 0.05%                                                                                                                    |
| 39 | Schliessbach et al. | Oxycodone              | oxycodone 15mg                                                                                                                                      |
| 40 | Bruehl & Chung      | Naloxone               | 8 mg dose of naloxone                                                                                                                               |
| 41 | Bruehl et al.       | Naloxone+Morphine      | naloxone , morphine                                                                                                                                 |
| 42 | Burns et al.        | Naloxone+Morphine      | naloxone and morphine                                                                                                                               |
| 43 | Eker et al.         | Lidocaine              | Group I (n = 26) received 7 mL 0.5% lidocaine                                                                                                       |
| 44 | Kim et al.          | Opioid                 | opioid therapy                                                                                                                                      |
| 45 | Kimos et al.        | Gabapentin             | gabapentin                                                                                                                                          |
| 46 | Narang et al.       | Opioid                 | Opioids                                                                                                                                             |
| 47 | Peyton et al.       | Ketamine               | Ketamine,                                                                                                                                           |
| 48 | Katz et al.         | Bupropion              | bupropion                                                                                                                                           |
| 49 | Hashmi et al.       | Lidocaine              | Lidocaine                                                                                                                                           |
| 50 | Shimoyama et al.    | Fentanyl               | fentanyl                                                                                                                                            |
| 51 | Wreje & Brorsson    | Sterile water          | sterile water                                                                                                                                       |
| 52 | Han et al.          | BTX-A                  | botulinum toxin type A                                                                                                                              |
| 53 | Rauck et al.        | Hydrocodone            | hydrocodone 20-100 □mg every 12 hours)                                                                                                              |
| 54 | Kim et al.          | Pregabalin             | pregabalin                                                                                                                                          |
| 55 | Lee et al.          | BTX-A                  | Botulinum Toxin Injection                                                                                                                           |
| 56 | Rashiq et al.       | Fentanyl               | Opioid                                                                                                                                              |
| 57 | Kang et al.         | Ketamine               | 0.12 mg/kg/h of ketamine                                                                                                                            |
| 58 | Lipton et al.       | Erenumab               | erenumab 70 and 140 □mg                                                                                                                             |
| 59 | Williamson et al.   | Duloxetine             | duloxetine                                                                                                                                          |
| 60 | Guo et al.          | Celecoxib Eperisone    | Celecoxib Eperisone                                                                                                                                 |
| 61 | Damjanov et al.     | ACS                    | Autologous conditioned serum (ACS; marketed as Orthokine®)                                                                                          |
| 62 | Abd-Elshafy et al.  | Bupivacaine            | Drug: Dexmedetomidine isobaric bupivacaine 0.5% (0.3ml/kg) and dexmedetomidine (1 mcg/kg)<br>Drug: Bupivacaine isobaric bupivacaine 0.5% (0.3ml/kg) |

|    |                    |                           |                                                                      |
|----|--------------------|---------------------------|----------------------------------------------------------------------|
| 63 | Levesque et al.    | BTX+Ropivacaine           | Drug: botulinum toxin A + ropivacaine<br>Drug: Ropivacaine           |
| 64 | Maher et al.       | Ketamine                  | Ketamine                                                             |
| 65 | Barry et al.       | Methadone                 | Methadone                                                            |
| 66 | Shokeir & Mousa    | Bupivacaine               | bupivacaine                                                          |
| 67 | Scudds et al.      | Lidocaine                 | lidocaine                                                            |
| 68 | Gimbel et al.      | Buccal buprenorphine      | buccal buprenorphine                                                 |
| 69 | Matsuoka et al.    | Duloxetine                | duloxetine 20 mg                                                     |
| 70 | Yurekli et al.     | Sodium valproate          | sodium valproate                                                     |
| 71 | Maarrawi et al.    | Amitriptyline             | amitriptyline                                                        |
| 72 | Li et al.          | Ropivacaine+Dexamethasone | single 20-mL injection of 0.50% ropivacaine plus 10 mg dexamethasone |
| 73 | Almog et al.       | THC                       | THC: 0.5mg, 1mg                                                      |
| 74 | Wylde et al.       | Bupivacaine               | anaesthetic with 3 mL of 0.5% plain bupivacaine                      |
| 75 | Matsukawa et al.   | Cernitin+Tadalafil        | Tadalafil                                                            |
| 76 | Haddad et al.      | Apomorphine               | Apomorphine                                                          |
| 77 | de Vries et al.    | THC                       | Tetrahydrocannabinol                                                 |
| 78 | Urquhart et al.    | Amitriptyline             | amitriptyline; 25mg per day                                          |
| 79 | Lichtman et al.    | Nabiximols                | nabiximols                                                           |
| 80 | Schiphorst et al.  | Acetaminophen/Tramadol    | acetaminophen/tramadol 325 mg/37.5 mg                                |
| 81 | Cardenas et al.    | Amitriptyline             | amitriptyline                                                        |
| 82 | Arnold et al.      | Milnacipran               | chronic pain                                                         |
| 83 | Wasan et al.       | Morphine                  | morphine                                                             |
| 84 | Baron et al.       | Tapentadol/Pregabalin     | tapentadol PR 300 mg/day+pregabalin                                  |
| 85 | Portenoy et al.    | Fentanyl                  | Fentanyl                                                             |
| 86 | Likar et al.       | Morphine                  | morphine hydrochloride                                               |
| 87 | Schwartzman et al. | Ketamine                  | ketamine                                                             |
| 88 | Chu et al.         | Morphine                  | Morphine                                                             |
| 89 | Sandrini et al.    | BoNTA                     | onabotulinum toxin A                                                 |
| 90 | Mahowald et al.    | BoNTA                     | Botulinum Toxin Type A                                               |
| 91 | Loftus et al.      | Ketamine                  | ketamine infusions                                                   |
| 92 | Lehmann et al.     | Fentanyl                  | Transdermal fentanyl                                                 |
| 93 | Kahlenberg et al.  | Celecoxib                 | celecoxib                                                            |
| 94 | Silberstein et al. | Topiramate                | topiramate                                                           |
| 95 | Burgher et al.     | Lidocaine                 | lidocaine and either clonidine (200 or 400mcg) or triamcinolone      |
| 96 | McCleane           | Phenytoin                 | phenytoin (Parke Davis)                                              |
| 97 | Naliboff et al.    | Opioid                    | Opioids                                                              |
| 98 | Booth et al.       | Morphine                  | 300 mcg spinal morphine and 1 gram acetaminophen                     |

|     |                         |                           |                                                   |
|-----|-------------------------|---------------------------|---------------------------------------------------|
| 99  | Lee et al.              | Rowatinex/Ibuprofen       | rowatinex 200 mg /ibuprofen 600 mg                |
| 100 | Levendoglu et al.       | Gabapentin                | Gabapentin                                        |
| 101 | Yousef & Alzeftawy      | Opioid                    | oral peroxicam                                    |
| 102 | Yelland et al.          | Gabapentin                | gabapentin                                        |
| 103 | Yucel et al.            | Venlafaxine               | venlafaxine                                       |
| 104 | Hudson et al.           | Nortriptyline             | nortriptyline                                     |
| 105 | Rauck et al.            | Ziconotide                | ziconotide                                        |
| 106 | Sandner-Kiesling et al. | Naloxone+Oxycodone        | oxycodone PR/naloxone PR                          |
| 107 | Wang et al.             | Diosmin                   | Diosmin                                           |
| 108 | Hawley et al.           | Lidocaine                 | Lidocaine                                         |
| 109 | Mathieson et al.        | Pregabalin                | pregabalin at a dose of 150 mg                    |
| 110 | Wetzel et al.           | Nonopioid analgesic drugs | oral nonopioid analgesic drug                     |
| 111 | Khan et al.             | Lidocaine+Pregabalin      | pregabalin                                        |
| 112 | Clarke et al.           | Gabapentin                | Gabapentin                                        |
| 113 | Ma et al.               | Oxycodone                 | oxycodone                                         |
| 114 | J. H. Lee & C. S. Lee   | TA-ER                     | tramadol hydrochloride 75-mg/acetaminophen 650-mg |
| 115 | Imamura et al.          | Lidocaine                 | paraspinous lidocaine injection                   |
| 116 | Baron et al.            | Tapentadol                | Tapentadol                                        |
| 117 | Kim et al.              | Lidocaine+Magnesium       | lidocaine (L), magnesium (M)                      |
| 118 | Iwamura et al.          | Eviprostat                | Eviprostat                                        |
| 119 | Zhang et al.            | Ningmitai                 | Ningmitai Capsule                                 |

633

634

635

636

## References

637

638

639

640

641

642

643

644

645

646

647

648

649

650

651

652

653

1. Dahlhamer J, Lucas J, Zelaya, C, et al. Prevalence of Chronic Pain and High-Impact Chronic Pain Among Adults — United States, 2016. *MMWR Morb Mortal Wkly Rep* 2018;67:1001–1006. DOI: <http://dx.doi.org/10.15585/mmwr.mm6736a2external icon>
2. Salanti G. Indirect and mixed-treatment comparison, network, or multiple-treatments meta-analysis: many names, many benefits, many concerns for the next generation evidence synthesis tool. *Res Synth Methods*. 2012 Jun;3(2):80-97. doi: 10.1002/jrsm.1037. Epub 2012 Jun 11. PMID: 26062083.
3. Brown, C.A., Lilford, R.J. The stepped wedge trial design: a systematic review. *BMC Med Res Methodol* 6, 54 (2006). <https://doi.org/10.1186/1471-2288-6-54>
4. Lumley, T. "Network Meta-analysis for Indirect Treatment Comparisons." *Statistics in Medicine* 21 (2002): null. <https://doi.org/10.1002/SIM.1201>.

654  
655  
656  
657  
658  
659  
660  
661  
662  
663  
664  
665  
666  
667  
668  
669  
670  
671  
672  
673  
674  
675  
676  
677  
678  
679  
680  
681  
682  
683  
684  
685  
686  
687  
688  
689  
690  
691  
692  
693  
694  
695  
696  
697  
698  
699  
700  
701  
702  
703

5. Li, T., Puhan, M.A., Vedula, S.S. et al. Network meta-analysis-highly attractive but more methodological research is needed. *BMC Med* 9, 79 (2011). <https://doi.org/10.1186/1741-7015-9-79>
6. Caldwell, D., A. Ades, and J. Higgins. "Simultaneous Comparison of Multiple Treatments: Combining Direct and Indirect Evidence." *BMJ: British Medical Journal* 331 (2005): 897–900. <https://doi.org/10.1136/bmj.331.7521.897>.
7. Jansen JP, Fleurence R, Devine B, Itzler R, Barrett A, Hawkins N, Lee K, Boersma C, Annemans L, Cappelleri JC. Interpreting indirect treatment comparisons and network meta-analysis for health-care decision making: report of the ISPOR task force on indirect treatment comparisons good research practices: part 1. *Value Health*. 2011;14(4):417–28.
8. Efthimiou O, Debray TP, van Valkenhoef G, Trelle S, Panayidou K, Moons KG, Reitsma JB, Shang A, Salanti G. GetReal in network meta-analysis: a review of the methodology. *Res Synth Methods*. 2016;7(3):236–63.
9. Dallenbach KM. Pain: History and present status. *Am J Psychol* 1939; 52: 331.
10. Turk DC and Monarch ES. Biopsychosocial perspective on chronic pain. In: Turk DC, Gatchel RJ, eds. *Psychological Approaches to Pain Management: A Practitioner's Handbook*. 2nd ed. Guilford. New York. 2002. .
11. Brown, C.A., Lilford, R.J. The stepped wedge trial design: a systematic review. *BMC Med Res Methodol* 6, 54 (2006). <https://doi.org/10.1186/1471-2288-6-54>
12. Campbell, J. (1996, November 11). Presidential Address. Speech given at the American Pain Society, Washington, DC. .
13. Zimmer Z, Fraser K, Grol-Prokopczyk H, Zajacova A. A global study of pain prevalence across 52 countries: examining the role of country-level contextual factors: Examining the role of country-level contextual factors. *Pain* 2022; 163: 1740–50.
14. *Relieving pain in America: A blueprint for transforming prevention, care, education, and research*. Washington, D.C.: National Academies Press, 2011.
15. Caldwell, D., A. Ades, and J. Higgins. "Simultaneous Comparison of Multiple Treatments: Combining Direct and Indirect Evidence." *BMJ: British Medical Journal* 331 (2005): 897–900. <https://doi.org/10.1136/bmj.331.7521.897>.

- 704 16. U.S. Department of Health and Human Services (2019, May). Pain  
705 Management Best Practices Inter-Agency Task Force Report: Updates,  
706 Gaps, Inconsistencies, and Recommendations. Retrieved from U. S.  
707 Department of Health and Human Services website:  
708 <https://www.hhs.gov/ash/advisory-committees/pain/reports/index.html>. .  
709
- 710 17. Borenstein M, Hedges LV, Higgins JP, Rothstein HR (2010): A basic  
711 introduction to fixed-effect and random-effects models for meta-analysis.  
712 *Research Synthesis Methods*, 1, 97–111  
713
- 714 18. Rothstein, H.R., Sutton, A.J., Borenstein, M.: *Publication Bias in Meta*  
715 *Analysis: Prevention, Assessment and Adjustments*. Wiley, Chichester  
716 (2005)  
717
- 718 19. Béliveau A, Boyne DJ, Slater J, Brenner D, Arora P. BUGSnet: an R  
719 package to facilitate the conduct and reporting of Bayesian network Meta-  
720 analyses. *BMC Med Res Methodol*. 2019 Oct 22;19(1):196. doi:  
721 10.1186/s12874-019-0829-2. PMID: 31640567; PMCID: PMC6805536.  
722
- 723 20. Jansen JP, Fleurence R, Devine B, Itzler R, Barrett A, Hawkins N, Lee K,  
724 Boersma C, Annemans L, Cappelleri JC. Interpreting indirect treatment  
725 comparisons and network meta-analysis for health-care decision making:  
726 report of the ISPOR task force on indirect treatment comparisons good  
727 research practices: part 1. *Value Health*. 2011;14(4):417–28.  
728
- 729 21. Opioid overdose. Who.int: [www.who.int/news-room/fact-](http://www.who.int/news-room/fact-sheets/detail/opioid-overdose)  
730 [sheets/detail/opioid-overdose](http://www.who.int/news-room/fact-sheets/detail/opioid-overdose). .  
731  
732  
733
- 734 22. Ho KY, Cardoso MS, Chaiamnuay S, et al. Practice advisory on the  
735 appropriate use of NSAIDs in primary care. *J Pain Res* 2020; 13: 1925–39.  
736
- 737 23. Chung JW, Zeng Y, Wong TK. Drug therapy for the treatment of chronic  
738 nonspecific low back pain: systematic review and meta-analysis. *Pain*  
739 *Physician* 2013; 16: E685-704.  
740
- 741 24. Laine L, Curtis SP, Cryer B, Kaur A, Cannon CP, MEDAL Steering  
742 Committee. Assessment of upper gastrointestinal safety of etoricoxib and  
743 diclofenac in patients with osteoarthritis and rheumatoid arthritis in the  
744 Multinational Etoricoxib and Diclofenac Arthritis Long-term (MEDAL)  
745 programme: a randomised comparison. *Lancet* 2007; 369: 465–73.  
746
- 747 25. Griffin MR. High-dose non-steroidal anti-inflammatories: painful choices.  
748 *Lancet* 2013; 382: 746–8.  
749
- 750 26. Trelle S, Reichenbach S, Wandel S, et al. Cardiovascular safety of non-  
751 steroidal anti-inflammatory drugs: network meta-analysis. *BMJ* 2011; 342:  
752 c7086.  
753

- 754 27. da Costa BR, Pereira TV, Saadat P, et al. Effectiveness and safety of non-  
755 steroidal anti-inflammatory drugs and opioid treatment for knee and hip  
756 osteoarthritis: network meta-analysis. *BMJ* 2021; 375: n2321.  
757
- 758 28. Overview | Chronic pain (primary and secondary) in over 16s: assessment  
759 of all chronic pain and management of chronic primary pain | Guidance |  
760 NICE. <https://www.nice.org.uk/guidance/ng193> (accessed Dec 9, 2022).  
761
- 762 29. Eccleston C, Aldington D, Moore A, de C Williams AC. Pragmatic but  
763 flawed: the NICE guideline on chronic pain. *Lancet* 2021; 397: 2029–31.  
764
- 765 30. Wood H. Anti-inflammatory drugs could cause chronic pain. *Nat Rev Neurol*  
766 2022; 18: 382.  
767
- 768 31. Bannuru RR, Osani MC, Vaysbrot EE, et al. OARSI guidelines for the non-  
769 surgical management of knee, hip, and polyarticular osteoarthritis.  
770 *Osteoarthritis Cartilage* 2019; 27: 1578–89.  
771
- 772 32. Enthoven WTM, Roelofs PDDM, Deyo RA, van Tulder MW, Koes BW. Non-  
773 steroidal anti-inflammatory drugs for chronic low back pain. *Cochrane*  
774 *Database Syst Rev* 2016; 2: CD012087.  
775
- 776 33. Hary V, Schitter S, Martinez V. Efficacy and safety of botulinum A toxin for  
777 the treatment of chronic peripheral neuropathic pain: A systematic review of  
778 randomized controlled trials and meta-analysis. *Eur J Pain* 2022; 26: 980–  
779 90.  
780
- 781 34. Orhurhu V, Orhurhu MS, Bhatia A, Cohen SP. Ketamine infusions for  
782 chronic pain: A systematic review and meta-analysis of randomized  
783 controlled trials. *Anesth Analg* 2019; 129: 241–54.  
784
- 785 35. Jin C, Chen Z, Zhang J. Meta-analysis of the efficacy of Ningmitai capsule  
786 on the treatment of chronic prostatitis in China. *Medicine (Baltimore)* 2018;  
787 97: e11840.  
788
- 789 36. Whiting PF, Wolff RF, Deshpande S, et al. Cannabinoids for medical use: A  
790 systematic review and meta-analysis: A systematic review and meta-  
791 analysis. *JAMA* 2015; 313: 2456–73.  
792
- 793 37. Wei J, Zhu X, Yang G, et al. The efficacy and safety of botulinum toxin type  
794 A in treatment of trigeminal neuralgia and peripheral neuropathic pain: A  
795 meta-analysis of randomized controlled trials. *Brain Behav* 2019; 9:  
796 e01409.  
797
- 798 38. Khalifeh M, Mehta K, Varguise N, Suarez-Durall P, Enciso R. Botulinum  
799 toxin type A for the treatment of head and neck chronic myofascial pain  
800 syndrome. *J Am Dent Assoc* 2016; 147: 959-973.e1.  
801
- 802 39. Meister MR, Brubaker A, Sutcliffe S, Lowder JL. Effectiveness of botulinum  
803 toxin for treatment of symptomatic pelvic floor myofascial pain in women: A



- 804 systematic review and meta-analysis: A systematic review and meta-  
805 analysis. *Female Pelvic Med Reconstr Surg* 2021; 27: e152–60.  
806
- 807 40. Guimarães Pereira JE, Ferreira Gomes Pereira L, Mercante Linhares R,  
808 Darcy Alves Bersot C, Aslanidis T, Ashmawi HA. Efficacy and safety of  
809 ketamine in the treatment of neuropathic pain: A systematic review and  
810 meta-analysis of randomized controlled trials. *J Pain Res* 2022; 15: 1011–  
811 37.  
812
- 813 41. Cohen SP, Bhatia A, Buvanendran A, et al. Consensus guidelines on the  
814 use of intravenous ketamine infusions for chronic pain from the American  
815 society of regional anesthesia and pain medicine, the American academy  
816 of pain medicine, and the American society of anesthesiologists. *Reg*  
817 *Anesth Pain Med* 2018; : 1.  
818
- 819 42. Zhang K, Liu Y, Yang W, et al. Efficacy and safety of Ningmitai capsule in  
820 patients with chronic prostatitis/chronic pelvic pain syndrome: A  
821 multicenter, randomized, double-blind, placebo-controlled trial. *Urology*  
822 2021; 153: 264–9.  
823
- 824 43. Jing Z, Liying G, Zhenqing W, et al. Efficacy and safety of Ningmitai  
825 capsules in patients with chronic epididymitis: A prospective, parallel  
826 randomized controlled clinical trial. *Evid Based Complement Alternat Med*  
827 2021; 2021: 9752592.  
828
- 829 44. Campbell G, Hall WD, Peacock A, et al. Effect of cannabis use in people  
830 with chronic non-cancer pain prescribed opioids: findings from a 4-year  
831 prospective cohort study. *Lancet Public Health* 2018; 3: e341–50.  
832
- 833 45. Boland EG, Bennett MI, Allgar V, Boland JW. Cannabinoids for adult  
834 cancer-related pain: systematic review and meta-analysis. *BMJ Support*  
835 *Palliat Care* 2020; 10: 14–24.  
836
- 837 46. Pergolizzi JV Jr, Magnusson P, Christo PJ, et al. Opioid therapy in cancer  
838 patients and survivors at risk of addiction, misuse or complex dependency.  
839 *Front Pain Res (Lausanne)* 2021; 2: 691720.  
840
- 841 47. Boudreau D, Von Korff M, Rutter CM, et al. Trends in long-term opioid  
842 therapy for chronic non-cancer pain. *Pharmacoepidemiol Drug Saf* 2009;  
843 18: 1166–75.  
844
- 845 48. The Lancet Public Health. Opioid overdose crisis: time for a radical rethink.  
846 *Lancet Public Health* 2022; 7: e195.  
847
- 848 49. World Health Organization Model List of Essential Medicines – 22nd List,  
849 2021. Geneva: World Health Organization; 2021  
850 (WHO/MHP/HPS/EML/2021.02)  
851

- 852 50. Busse JW, Wang L, Kamaleldin M, et al. Opioids for chronic noncancer  
853 pain: A systematic review and meta-analysis: A systematic review and  
854 meta-analysis. *JAMA* 2018; 320: 2448–60.  
855
- 856 51. Dowell D, Ragan KR, Jones CM, Baldwin GT, Chou R. CDC clinical  
857 practice guideline for Prescribing Opioids for pain - United States, 2022.  
858 *MMWR Recomm Rep* 2022; 71: 1–95.  
859
- 860 52. Meng Z, Yu J, Acuff M, et al. Tolerability of opioid analgesia for chronic  
861 pain: A network meta-analysis. *Sci Rep* 2017; 7: 1995.  
862
- 863 53. Caraceni A, Hanks G, Kaasa S, et al. Use of opioid analgesics in the  
864 treatment of cancer pain: evidence-based recommendations from the  
865 EAPC. *Lancet Oncol* 2012; 13: e58-68.  
866
- 867 54. World Health Organization. Cancer pain relief, second edition, with a guide  
868 to opioid availability. Geneva: World Health Organization; 1996. .  
869
- 870 55. Noori A, Sadeghirad B, Wang L, et al. Comparative benefits and harms of  
871 individual opioids for chronic non-cancer pain: a systematic review and  
872 network meta-analysis of randomised trials. *Br J Anaesth* 2022; 129: 394–  
873 406.  
874
- 875 56. Gehling M, Hermann B, Tryba M. Meta-analysis of dropout rates in  
876 randomized controlled clinical trials: opioid analgesia for osteoarthritis pain:  
877 Opioid analgesia for osteoarthritis pain. *Schmerz* 2011; 25: 296–305.  
878
- 879 57. Huang L, Zhou J-G, Zhang Y, et al. Opioid-induced constipation relief from  
880 fixed-ratio combination prolonged-release oxycodone/naloxone compared  
881 with oxycodone and morphine for chronic nonmalignant pain: A systematic  
882 review and meta-analysis of randomized controlled trials. *J Pain Symptom*  
883 *Manage* 2017; 54: 737-748.e3.  
884
- 885 58. Schlereth T. Guideline “diagnosis and non interventional therapy of  
886 neuropathic pain” of the German Society of Neurology (deutsche  
887 Gesellschaft für Neurologie). *Neurol Res Pract* 2020; 2: 16.  
888
- 889 59. Wiffen PJ, Derry S, Bell RF, et al. Gabapentin for chronic neuropathic pain  
890 in adults. *Cochrane Database Syst Rev* 2017; 6: CD007938.  
891
- 892 60. Shanthanna H, Gilron I, Rajarathinam M, et al. Benefits and safety of  
893 gabapentinoids in chronic low back pain: A systematic review and meta-  
894 analysis of randomized controlled trials. *PLoS Med* 2017; 14: e1002369.  
895
- 896 61. Evoy KE, Morrison MD, Saklad SR. Abuse and misuse of pregabalin and  
897 gabapentin. *Drugs* 2017; 77: 403–26.  
898
- 899 62. Alberti FF, Becker MW, Blatt CR, Ziegelmann PK, da Silva Dal Pizzol T,  
900 Pilger D. Comparative efficacy of amitriptyline, duloxetine and pregabalin

- 901 for treating fibromyalgia in adults: an overview with network meta-analysis.  
902 Clin Rheumatol 2022; 41: 1965–78.  
903
- 904 63. Urquhart DM, Wluka AE, van Tulder M, et al. Efficacy of low-dose  
905 amitriptyline for chronic low back pain: A randomized clinical trial: A  
906 randomized clinical trial. JAMA Intern Med 2018; 178: 1474–81.  
907
- 908 64. Sankar V, Oommen AE, Thomas A, Nair JV, James JS. Efficacy, safety  
909 and cost effectiveness of amitriptyline and pregabalin in patients with  
910 diabetic peripheral neuropathy. Indian J Pharm Sci 2017; 79.  
911 DOI:10.4172/pharmaceutical-sciences.1000274.  
912
- 913 65. Levene JL, Weinstein EJ, Cohen MS, et al. Local anesthetics and regional  
914 anesthesia versus conventional analgesia for preventing persistent  
915 postoperative pain in adults and children: A Cochrane systematic review  
916 and meta-analysis update. J Clin Anesth 2019; 55: 116–27.  
917
- 918 66. Donado C, Lobo K, Velarde-Álvarez MF, et al. Continuous regional  
919 anesthesia and inpatient rehabilitation for pediatric complex regional pain  
920 syndrome. Reg Anesth Pain Med 2017; 42: 527–34.  
921
- 922 67. Meng H, Fei Q, Wang B, et al. Epidural injections with or without steroids in  
923 managing chronic low back pain secondary to lumbar spinal stenosis: a  
924 meta-analysis of 13 randomized controlled trials. Drug Des Devel Ther  
925 2015; 9: 4657–67.  
926
- 927 68. Egli S, Pfister M, Ludin SM, Puente de la Vega K, Busato A, Fischer L.  
928 Long-term results of therapeutic local anesthesia (neural therapy) in 280  
929 referred refractory chronic pain patients. BMC Complement Altern Med  
930 2015; 15: 200.  
931
- 932 69. Challapalli V, Tremont-Lukats IW, McNicol ED, Lau J, Carr DB. Systemic  
933 administration of local anesthetic agents to relieve neuropathic pain.  
934 Cochrane Database Syst Rev 2005; : CD003345.  
935
- 936 70. Abd-Elshafy SK, Abdallal F, Kamel EZ, et al. Paravertebral  
937 dexmedetomidine in video-assisted thoracic surgeries for acute and chronic  
938 pain prevention. Pain Physician 2019; 22: 271–80.  
939
- 940 71. Park R, Ho AM-H, Pickering G, Arendt-Nielsen L, Mohiuddin M, Gilron I.  
941 Efficacy and safety of magnesium for the management of chronic pain in  
942 adults: A systematic review: A systematic review. Anesth Analg 2020; 131:  
943 764–75.  
944  
945
